# Supplementary material
Source: publisher figshare collection journal article supplement (https://gsapubs.figshare.com/ndownloader/files/31675451)
Supplement: Supplementary file 1 [file 31675451]

## Sheet: Table S1
Table DR1: Zircon U-Pb geochronologic analyses by Laser-Ablation Multicollector Inductively Coupled Plasma Mass Spectrometry
Washington State University			Isotopic Ratios									Dates
Sample ID			Pb 207 Corrected					Non Corrected				207Pb/235U	2s Abs Error	206Pb/238U	2s Abs Error	207Pb/206Pb	2s Abs Error	Best Date	2s Abs Error
	U ppm	U/Th	207Pb/235U	2s Abs Error	206Pb/238U	2s Abs Error	Corr. Coef.	238U/206Pb	2s Abs Error	207Pb/206Pb	2s Abs Error	Ma	Ma	Ma	Ma	Ma	Ma	Ma	Ma
Beavers Bend
Beavers Bend-1	251	1.983	0.377966	0.019	0.0494144	0.001	0.18761	20.1613	0.406478	0.0555	0.0026	325.739	14	310.925	6.26016	400	110	310.925	6.26016
Beavers Bend-2	380.9	1.659	0.375033	0.0081	0.0494767	0.00081	0.35059	20.1491	0.328849	0.055	0.0012	323.574	6	311.308	5.02758	408	51	311.308	5.02758
Beavers Bend-3	164.2	2.666	0.421465	0.016	0.0518327	0.00086	0.21536	19.1424	0.315132	0.059	0.0022	357.316	11	325.764	5.35835	532	82	325.764	5.35835
Beavers Bend-4	204	1.743	0.392301	0.0084	0.0531067	0.00066	0.32533	18.8182	0.233723	0.0536	0.0011	336.254	6.1	333.567	4.10377	343	45	333.567	4.10377
Beavers Bend-5	278.9	1.615	0.376367	0.0063	0.0482065	0.00054	0.33106	20.6313	0.229852	0.05665	0.00095	324.559	4.6	303.501	3.35225	462	38	303.501	3.35225
Beavers Bend-6	97.5	4.7	1.83732	0.036	0.174041	0.0019	0.25115	5.7241	0.0622541	0.0766	0.0015	1059.55	13	1034.34	11.0749	1088	40	1088	40
Beavers Bend-7	651	1.915	0.58121	0.0075	0.0741034	0.00085	0.49465	13.4825	0.154512	0.05691	0.00074	465.522	4.9	460.83	5.19	485	28	460.83	5.19
Beavers Bend-8	144.2	2.559	0.404611	0.0097	0.0521463	0.00071	0.57137	19.0949	0.258877	0.0563	0.0011	345.197	7.2	327.685	4.39734	447	45	327.685	4.39734
Beavers Bend-9	153.3	1.83	0.399762	0.011	0.0520764	0.00056	0.10239	19.1351	0.205045	0.0557	0.0017	341.684	8.1	327.257	3.52372	405	65	327.257	3.52372
Beavers Bend-10	262.7	1.163	0.397942	0.011	0.0522142	0.00082	0.18912	19.0949	0.298984	0.0553	0.0016	340.362	7.9	328.101	5.10096	404	66	328.101	5.10096
Beavers Bend-11	239	2.177	0.391721	0.013	0.0526353	0.0012	0.22372	18.9753	0.432076	0.054	0.0019	335.83	9.3	330.681	7.45418	345	78	330.681	7.45418
Beavers Bend-12	67.6	1.55	1.8125	0.039	0.177243	0.0024	0.34419	5.64334	0.0764335	0.0742	0.0016	1050.62	14	1051.9	13.965	1028	42	1028	42
Beavers Bend-13	357	4.71	0.566238	0.0089	0.0735779	0.00088	0.3411	13.5962	0.162674	0.05584	0.00092	455.856	5.8	457.675	5.38967	431	37	457.675	5.38967
Beavers Bend-14	241.6	1.268	0.379206	0.0093	0.049846	0.0008	0.21945	19.996	0.319872	0.0552	0.0014	326.653	6.8	313.576	4.9724	405	56	313.576	4.9724
Beavers Bend-15	320	1.072	0.457013	0.0088	0.048694	0.00066	0.4072	20.1248	0.267304	0.0681	0.0012	382.411	6.1	306.498	4.04002	855	37	306.498	4.04002
Beavers Bend-16	242	1.834	0.398304	0.0091	0.050703	0.00054	0.13496	19.6155	0.207775	0.057	0.0014	340.625	6.6	318.836	3.37406	463	54	318.836	3.37406
Beavers Bend-17	285	1.308	0.399266	0.008	0.0524828	0.00069	0.45543	19.0006	0.249105	0.0552	0.001	341.323	5.8	329.747	4.27597	402	41	329.747	4.27597
Beavers Bend-18	179.5	1.243	0.397796	0.011	0.0487565	0.00087	0.25965	20.3335	0.359702	0.0592	0.0017	340.256	8.1	306.883	5.39036	546	64	306.883	5.39036
Beavers Bend-19	1108	0.644	0.400672	0.0085	0.0519152	0.00056	0.22429	19.1865	0.206148	0.056	0.0012	342.344	6.1	326.269	3.48687	435	47	326.269	3.48687
Beavers Bend-20	476.1	1.089	0.375232	0.0064	0.0500489	0.00047	0.33433	19.9362	0.186803	0.0544	0.00091	323.721	4.7	314.822	2.92817	374	38	314.822	2.92817
Beavers Bend-21	535	1.006	0.394315	0.013	0.0479251	0.00092	0.1019	20.6697	0.393058	0.0597	0.0023	337.723	9.5	301.771	5.72453	552	81	301.771	5.72453
Beavers Bend-22	657	5.5	1.6661	0.024	0.166059	0.0027	0.68597	6.01685	0.0977466	0.0728	0.0011	996.307	9.2	990.362	15.6442	1001	29	1001	29
Beavers Bend-23	336.6	1.315	0.379944	0.007	0.0513667	0.00052	0.31144	19.4477	0.19667	0.05367	0.00096	327.196	5.2	322.907	3.23917	343	41	322.907	3.23917
Beavers Bend-24	434	1.165	0.398917	0.0091	0.0522477	0.00076	0.25102	19.0803	0.276685	0.0554	0.0013	341.07	6.6	328.306	4.71775	415	54	328.306	4.71775
Beavers Bend-25	489	0.782	0.373831	0.011	0.0497706	0.00069	0.26686	20.0441	0.277218	0.0545	0.0017	322.685	8.5	313.113	4.31876	374	71	313.113	4.31876
Beavers Bend-26	453.2	1.238	0.383916	0.011	0.0512072	0.00072	0.082186	19.4894	0.273482	0.0544	0.0016	330.116	7.9	321.929	4.49582	373	69	321.929	4.49582
Beavers Bend-27	273	0.967	0.43428	0.014	0.0486283	0.00087	0.37542	20.2388	0.356361	0.0648	0.002	366.434	10	306.095	5.36893	738	66	306.095	5.36893
Beavers Bend-28	831	0.806	0.384274	0.0067	0.0496753	0.00059	0.42122	20.0401	0.236947	0.05613	0.00098	330.379	4.9	312.528	3.66082	445	37	312.528	3.66082
Beavers Bend-29	375	1.462	0.376131	0.009	0.050354	0.00057	0.050798	19.8216	0.223951	0.0542	0.0014	324.385	6.7	316.695	3.56856	354	58	316.695	3.56856
Beavers Bend-30	2294	1.029	0.395193	0.0075	0.0522313	0.0006	0.25028	19.0985	0.218853	0.0549	0.0011	338.362	5.4	328.206	3.73053	393	44	328.206	3.73053
Beavers Bend-31	99.7	1.05	2.14657	0.048	0.193965	0.0031	0.34917	5.13875	0.0818608	0.0803	0.0018	1164.66	16	1142.82	17.8411	1188	47	1188	47
Beavers Bend-32	391.9	1.51	0.380316	0.009	0.0511028	0.00051	0.17894	19.5389	0.194702	0.054	0.0013	327.47	6.6	321.289	3.19668	341	53	321.289	3.19668
Beavers Bend-33	610	0.926	0.380369	0.0073	0.0496392	0.00049	0.31826	20.0682	0.19734	0.0556	0.001	327.509	5.4	312.306	3.05112	424	41	312.306	3.05112
Beavers Bend-34	414	1.05	0.393693	0.011	0.0507392	0.00067	0.24577	19.6194	0.257897	0.0563	0.0015	337.269	8.1	319.058	4.17479	455	62	319.058	4.17479
Beavers Bend-35	576	1.155	0.367917	0.0098	0.0502746	0.00062	0.32765	19.8807	0.245051	0.0531	0.0014	318.302	7.3	316.207	3.87943	307	58	316.207	3.87943
Beavers Bend-36	850	1.002	0.373446	0.007	0.0502729	0.00055	0.30232	19.861	0.216952	0.0539	0.001	322.401	5.2	316.197	3.42537	350	43	316.197	3.42537
Beavers Bend-37	702	0.991	0.480497	0.018	0.0489672	0.00062	0.14657	19.9322	0.246322	0.0712	0.0027	398.657	13	308.177	3.90527	919	79	308.177	3.90527
Beavers Bend-38	223	1.66	1.92384	0.054	0.176923	0.0023	0.33587	5.61798	0.0725918	0.0789	0.002	1090.06	19	1050.14	13.417	1168	51	1168	51
Beavers Bend-39	556	0.945	0.402207	0.0087	0.052301	0.00062	0.23788	19.0512	0.225029	0.0558	0.0013	343.457	6.3	328.633	3.85947	427	50	328.633	3.85947
Beavers Bend-40	827	0.742	0.417066	0.015	0.04961	0.00062	0.015455	19.9402	0.246519	0.061	0.0025	354.167	11	312.127	3.93018	597	87	312.127	3.93018
Beavers Bend-41	834	0.824	0.390437	0.0071	0.0502303	0.00058	0.35467	19.8137	0.227699	0.0564	0.001	334.893	5	315.935	3.5985	457	39	315.935	3.5985
Beavers Bend-42	877	1.032	0.381854	0.0075	0.0502851	0.00064	0.31577	19.8255	0.251553	0.0551	0.0011	328.601	5.5	316.272	3.97699	401	46	316.272	3.97699
Beavers Bend-43	910	3.29	0.491682	0.01	0.0634808	0.00083	0.39087	15.7208	0.205129	0.0562	0.0012	406.304	6.9	396.759	5.11788	442	45	396.759	5.11788
Beavers Bend-44	506	1.06	0.381709	0.0079	0.0504492	0.0006	0.29294	19.7667	0.234435	0.0549	0.0012	328.495	5.8	317.279	3.73734	381	46	317.279	3.73734
Beavers Bend-45	536	1.372	0.381893	0.0083	0.0507508	0.00064	0.18681	19.6579	0.247318	0.0546	0.0013	328.63	6.1	319.129	3.98876	372	51	319.129	3.98876
Beavers Bend-46	777	0.824	0.374906	0.0073	0.0496405	0.00053	0.35895	20.0884	0.213878	0.0548	0.001	323.48	5.4	312.314	3.29941	385	41	312.314	3.29941
Beavers Bend-47	586	1.335	0.399723	0.011	0.0508837	0.00098	0.012348	19.5465	0.374425	0.057	0.0019	341.656	8	319.945	6.08464	466	70	319.945	6.08464
Beavers Bend-48	591	1.008	0.40336	0.01	0.0518011	0.00079	0.43723	19.216	0.291711	0.0565	0.0013	344.292	7.4	325.57	4.89552	454	51	325.57	4.89552
Beavers Bend-49	947	1.068	0.38165	0.0068	0.0517614	0.00077	0.12561	19.305	0.286967	0.0535	0.0012	328.452	5	325.326	4.7867	336	49	325.326	4.7867
Beavers Bend-50	1240	1.06	0.467381	0.031	0.0605588	0.0029	0.62678	16.4745	0.787083	0.056	0.0027	389.616	21	379.023	17.8363	420	110	379.023	17.8363
Beavers Bend-51	556	5.97	0.562629	0.012	0.0703863	0.001	0.14	14.1643	0.200628	0.058	0.0014	453.512	7.7	438.483	6.13695	504	54	438.483	6.13695
Beavers Bend-52	403	1.428	0.374476	0.0084	0.0501324	0.00056	0.21	19.9084	0.221953	0.0542	0.0012	323.162	6.2	315.335	3.49571	357	50	315.335	3.49571
Beavers Bend-53	595	1.178	0.381404	0.0094	0.0504089	0.00083	0.35079	19.7824	0.324815	0.0549	0.0014	328.271	7	317.032	5.15757	388	57	317.032	5.15757
Beavers Bend-54	168.9	0.928	0.760802	0.018	0.0910947	0.0012	0.18368	10.9529	0.143959	0.0606	0.0015	574.823	10	562.008	7.28813	586	55	562.008	7.28813
Beavers Bend-55	584	1.056	0.396275	0.008	0.0518082	0.00056	0.29981	19.2382	0.20726	0.0555	0.0011	339.15	5.8	325.613	3.48345	414	45	325.613	3.48345
Beavers Bend-56	399	0.747	0.379456	0.011	0.0500602	0.00075	0.35011	19.9164	0.297496	0.055	0.0015	326.837	7.8	314.891	4.6715	384	61	314.891	4.6715
Beavers Bend-57	620	1.056	0.392241	0.0069	0.0525107	0.0006	0.19987	19.015	0.216943	0.0542	0.0011	336.21	5.1	329.918	3.73351	363	43	329.918	3.73351
Beavers Bend-58	567	1.196	0.377422	0.0082	0.0501567	0.00093	0.2779	19.8886	0.367868	0.0546	0.0013	325.338	6.1	315.484	5.77094	386	52	315.484	5.77094
Beavers Bend-59	539	1.104	0.371587	0.0072	0.0503025	0.0005	0.25712	19.857	0.197151	0.0536	0.0011	321.025	5.4	316.379	3.12498	340	44	316.379	3.12498
Beavers Bend-60	725	0.902	0.39569	0.014	0.051825	0.00076	0.44858	19.2345	0.281173	0.0554	0.0018	338.724	9.9	325.716	4.74631	408	71	325.716	4.74631
Beavers Bend-61	568	1.136	0.396807	0.0067	0.0525403	0.00055	0.30995	18.9898	0.198336	0.0548	0.00093	339.537	4.9	330.099	3.41591	387	38	330.099	3.41591
Beavers Bend-62	473	1.198	0.371629	0.0088	0.0509739	0.00077	0.38982	19.6155	0.296272	0.0529	0.0012	321.056	6.5	320.498	4.79164	311	51	320.498	4.79164
Beavers Bend-63	545	1.024	0.380949	0.0075	0.0505328	0.0006	0.12786	19.7394	0.233787	0.0547	0.0012	327.936	5.6	317.792	3.73819	385	50	317.792	3.73819
Beavers Bend-64	532	0.982	0.37506	0.0088	0.0510584	0.00052	0.084968	19.5733	0.199219	0.0533	0.0013	323.594	6.5	321.016	3.26044	318	55	321.016	3.26044
Beavers Bend-65	342.1	1.169	0.375949	0.0069	0.0511795	0.00057	0.1957	19.5274	0.217353	0.0533	0.00097	324.251	5.1	321.759	3.54857	338	43	321.759	3.54857
Beavers Bend-66	427	1.182	0.398848	0.0077	0.0515867	0.00048	0.15954	19.305	0.178888	0.0561	0.0012	341.02	5.7	324.256	2.99937	434	46	324.256	2.99937
Beavers Bend-67	423	1.063	0.406838	0.0084	0.0519717	0.00053	0.093499	19.1461	0.194283	0.0568	0.0013	346.807	6	326.615	3.30724	462	49	326.615	3.30724
Beavers Bend-68	787	0.627	0.462934	0.02	0.0505116	0.00057	0.026571	19.4477	0.215581	0.0665	0.003	386.532	14	317.662	3.67928	733	87	317.662	3.67928
Beavers Bend-69	549	0.738	0.410166	0.0097	0.0490304	0.00092	0.46702	20.1816	0.374715	0.0607	0.0013	349.208	7.1	308.566	5.66796	616	46	308.566	5.66796
Beavers Bend-70	419.6	1.265	0.375529	0.007	0.0502734	0.00053	0.22323	19.8531	0.208897	0.0542	0.0011	323.941	5.3	316.2	3.30642	360	44	316.2	3.30642
Beavers Bend-71	443	1.131	0.390297	0.0084	0.0525413	0.00069	0.30359	19.0114	0.249389	0.0539	0.0012	334.79	6.1	330.105	4.29184	342	49	330.105	4.29184
Beavers Bend-72	563.3	1.157	0.381092	0.0068	0.0507372	0.00056	0.30147	19.6657	0.216574	0.0545	0.001	328.041	5	319.046	3.48372	375	41	319.046	3.48372
Beavers Bend-73	705	1.048	0.382272	0.0079	0.0508011	0.0006	0.29877	19.6386	0.231406	0.0546	0.0011	328.909	5.8	319.438	3.73338	387	44	319.438	3.73338
Beavers Bend-74	349	1.267	0.392324	0.0078	0.051664	0.0006	0.26237	19.3013	0.223524	0.0551	0.0011	336.271	5.8	324.729	3.73017	396	46	324.729	3.73017
Beavers Bend-75	327	1.553	0.398557	0.0092	0.052772	0.00064	0.19624	18.9072	0.228788	0.0548	0.0013	340.809	6.7	331.518	3.9861	382	55	331.518	3.9861
Beavers Bend-76	343.8	1.563	0.395498	0.013	0.0522716	0.0011	0.13557	19.084	0.400618	0.0549	0.002	338.584	9.4	328.453	6.83837	376	80	328.453	6.83837
Beavers Bend-77	669	1.115	0.39422	0.01	0.0521978	0.00064	0.34271	19.1132	0.2338	0.0548	0.0014	337.653	7.1	328.001	3.9924	379	51	328.001	3.9924
Beavers Bend-78	596	1.06	0.398654	0.011	0.0516538	0.00065	0.45181	19.2827	0.241684	0.056	0.0013	340.879	7.9	324.667	4.04217	435	53	324.667	4.04217
Beavers Bend-79	392	1.395	0.40309	0.013	0.0514025	0.00084	0.33899	19.3536	0.314632	0.0569	0.0018	344.097	9.2	323.126	5.22491	448	68	323.126	5.22491
Beavers Bend-80	259.5	1.558	0.403078	0.012	0.052227	0.00074	0.19593	19.073	0.269198	0.056	0.0017	344.088	8.7	328.18	4.61446	428	68	328.18	4.61446
Beavers Bend-81	677	0.82	0.409409	0.018	0.0482248	0.0011	0.50417	20.4918	0.461905	0.0616	0.0023	348.662	13	303.614	6.80324	636	76	303.614	6.80324
Beavers Bend-82	490	1.532	0.383432	0.011	0.0513314	0.00074	0.25094	19.4477	0.279877	0.0542	0.0016	329.761	8.1	322.69	4.61915	350	64	322.69	4.61915
Beavers Bend-83	148.8	1.676	0.589807	0.015	0.073281	0.00098	0.35951	13.6054	0.181406	0.0584	0.0014	471.031	9.5	455.892	6.0087	518	53	455.892	6.0087
Beavers Bend-84	378.2	1.801	0.562691	0.013	0.0656407	0.00071	0.1962	15.0921	0.161717	0.0622	0.0015	453.553	8.5	409.839	4.38001	645	51	409.839	4.38001
Beavers Bend-85	298	1.172	0.399685	0.011	0.0520663	0.0007	0.24561	19.1388	0.256404	0.0557	0.0014	341.628	7.8	327.195	4.35434	428	59	327.195	4.35434
Beavers Bend-86	811	1.097	0.399458	0.011	0.049043	0.00079	0.20912	20.2184	0.322938	0.0591	0.0016	341.463	7.9	308.644	4.89778	569	63	308.644	4.89778
Beavers Bend-87	515	1.143	0.410295	0.017	0.049951	0.001	0.3133	19.8413	0.393676	0.0596	0.0024	349.301	12	314.221	6.21603	544	87	314.221	6.21603
Beavers Bend-88	971	1.24	0.402984	0.01	0.0514795	0.00074	0.40711	19.3274	0.276426	0.0568	0.0013	344.02	7.5	323.598	4.58825	466	52	323.598	4.58825
Beavers Bend-89	385	1.347	0.410707	0.011	0.0520081	0.0012	0.24071	19.1205	0.43871	0.0573	0.0018	349.597	8.1	326.838	7.42056	470	69	326.838	7.42056
Beavers Bend-90	546	1.116	0.373041	0.0073	0.0501253	0.00051	0.3485	19.9164	0.202297	0.054	0.001	322.101	5.4	315.291	3.17951	352	42	315.291	3.17951
Beavers Bend-91	229.1	1.139	1.61555	0.058	0.155058	0.0028	0.08968	6.40205	0.114761	0.0756	0.0029	976.861	22	929.253	16.5037	1030	77	1030	77
Beavers Bend-92	399	1.484	0.37152	0.0091	0.0506716	0.00077	0.29353	19.7239	0.299554	0.0532	0.0013	320.975	6.7	318.643	4.79459	320	56	318.643	4.79459
Beavers Bend-93	162.1	1.914	0.377173	0.0099	0.0510587	0.00063	0.18492	19.5656	0.241173	0.0536	0.0015	325.154	7.3	321.018	3.94388	321	60	321.018	3.94388
Beavers Bend-94	311.6	1.581	0.39548	0.011	0.0521742	0.00076	0.41088	19.1168	0.277744	0.055	0.0014	338.571	7.7	327.856	4.72516	388	55	327.856	4.72516
Beavers Bend-95	501	1.005	0.415588	0.0076	0.0538576	0.0007	0.48711	18.5014	0.239611	0.05599	0.00089	353.107	5.5	338.162	4.3264	434	35	338.162	4.3264
Beavers Bend-96	178	0.89	0.434509	0.01	0.0523716	0.00091	0.36942	18.9179	0.325677	0.0602	0.0014	366.596	7.4	329.066	5.60752	588	53	329.066	5.60752
Beavers Bend-97	385	1.23	0.37333	0.007	0.0506425	0.00054	0.28916	19.7278	0.21016	0.05349	0.00099	322.315	5.2	318.465	3.36485	338	43	318.465	3.36485
Beavers Bend-98	446	1.124	0.377862	0.0069	0.0505857	0.00065	0.34617	19.7316	0.25307	0.0542	0.001	325.662	5.1	318.117	4.03832	360	42	318.117	4.03832
Beavers Bend-99	587	0.89	0.368774	0.0055	0.0502876	0.00051	0.3311	19.8728	0.201414	0.05321	0.00081	318.939	4.1	316.287	3.17384	328	34	316.287	3.17384
Beavers Bend-100	487.6	1.018	0.412874	0.012	0.0515627	0.00062	0.31854	19.2641	0.230086	0.0581	0.0015	351.157	8.2	324.109	3.86142	503	56	324.109	3.86142
Beavers Bend-101	394	1.65	0.375891	0.0081	0.0513643	0.00071	0.11102	19.4628	0.268949	0.0531	0.0013	324.208	6	322.892	4.42533	319	55	322.892	4.42533
Beavers Bend-102	355.4	1.338	0.36537	0.0088	0.0506903	0.00073	0.20006	19.7394	0.284441	0.0523	0.0013	316.409	6.8	318.758	4.55367	285	57	318.758	4.55367
Beavers Bend-103	166.2	2.163	1.80079	0.036	0.174685	0.0031	0.65756	5.71755	0.10134	0.0748	0.0012	1046.38	13	1037.87	17.8869	1051	33	1051	33
Beavers Bend-104	289	1.42	0.400278	0.012	0.0523315	0.001	0.49168	19.0476	0.362812	0.0555	0.0015	342.058	8.4	328.82	6.19715	413	59	328.82	6.19715
Beavers Bend-105	60.8	2.66	1.70054	0.036	0.16765	0.0022	0.28417	5.95593	0.0780407	0.0736	0.0016	1009.35	14	999.15	12.8428	1015	45	1015	45
Beavers Bend-106	379	1.299	0.372725	0.007	0.0492618	0.00052	0.28355	20.2388	0.212997	0.0549	0.001	321.867	5.3	309.988	3.23799	397	45	309.988	3.23799
Beavers Bend-107	612	1.044	0.377959	0.0069	0.0509749	0.00055	0.23417	19.5925	0.211126	0.0538	0.001	325.734	5.1	320.504	3.42511	345	43	320.504	3.42511
Beavers Bend-108	633	1.261	0.38194	0.0083	0.0500242	0.0006	0.19622	19.9203	0.238092	0.0554	0.0013	328.665	6	314.67	3.74072	403	51	314.67	3.74072
Beavers Bend-109	674	1.457	0.384705	0.0078	0.0503862	0.00071	0.24394	19.7785	0.277744	0.0554	0.0012	330.695	5.7	316.892	4.40927	413	48	316.892	4.40927
Beavers Bend-110	363	1.503	0.396506	0.0095	0.0518383	0.00071	0.46034	19.2271	0.262473	0.0555	0.0012	339.318	6.9	325.798	4.4067	409	49	325.798	4.4067
Beavers Bend-111	980	3.04	0.399843	0.01	0.0496788	0.00091	0.44502	19.98	0.363273	0.0584	0.0016	341.743	7.4	312.549	5.63407	516	59	312.549	5.63407
Beavers Bend-112	434	1.563	0.387974	0.0086	0.052619	0.00069	0.33033	18.9933	0.248916	0.0535	0.0012	333.091	6.3	330.581	4.29389	327	48	330.581	4.29389
Hatton
Hatton Tuff_1	69	2.26	0.398939	0.018	0.0523451	0.00095	0.0001	19.0476	0.344671	0.0553	0.0026	341.087	13	328.903	5.95818	370	100	328.903	5.95818
Hatton Tuff_2	152.4	2.513	0.379729	0.0091	0.0501875	0.00056	0.16029	19.8689	0.221072	0.0549	0.0014	327.038	6.7	315.673	3.50456	377	54	315.673	3.50456
Hatton Tuff_3	864	1.295	0.376968	0.0085	0.0502805	0.00075	0.3147	19.8452	0.295374	0.0544	0.0012	325.003	6.2	316.244	4.66081	376	51	316.244	4.66081
Hatton Tuff_4	202.4	1.822	0.3806	0.0072	0.0502112	0.00048	0.23314	19.857	0.189265	0.055	0.0011	327.679	5.3	315.818	2.9974	396	42	315.818	2.9974
Hatton Tuff_5	22.8	3.57	1.65176	0.052	0.160658	0.003	0.26595	6.19579	0.115163	0.0746	0.0023	990.83	20	960.434	17.5214	1038	65	1038	65
Hatton Tuff_6	91.3	2.54	0.391156	0.012	0.0502338	0.00086	0.1477	19.8098	0.337489	0.0565	0.0018	335.418	9.1	315.957	5.3507	457	74	315.957	5.3507
Hatton Tuff_7	135	2.195	0.404065	0.019	0.0520759	0.0016	0.33465	19.1205	0.584947	0.0563	0.0026	344.802	14	327.254	9.91503	440	100	327.254	9.91503
Hatton Tuff_8	143.5	2.407	0.372057	0.0079	0.0504603	0.00054	0.0001	19.7981	0.21166	0.0535	0.0013	321.373	6	317.347	3.38196	326	54	317.347	3.38196
Hatton Tuff_9	157.5	1.779	0.378721	0.01	0.0498726	0.00076	0.23511	19.988	0.303636	0.0551	0.0016	326.296	7.4	313.74	4.73758	389	64	313.74	4.73758
Hatton Tuff_10	288	1.686	0.386014	0.0076	0.0480429	0.00057	0.15424	20.6569	0.243223	0.0583	0.0012	331.656	5.5	302.495	3.54049	523	47	302.495	3.54049
Hatton Tuff_11	437	1.068	0.444326	0.013	0.0477631	0.0008	0.31733	20.5297	0.337174	0.0675	0.0018	373.526	9.3	300.773	4.91891	824	58	300.773	4.91891
Hatton Tuff_12	166.8	2.317	0.378652	0.0086	0.0488007	0.00057	0.16703	20.3915	0.237014	0.0563	0.0013	326.245	6.3	307.154	3.55407	452	55	307.154	3.55407
Hatton Tuff_13	163.6	2.202	0.376912	0.0095	0.0498152	0.00072	0.33542	20.016	0.288461	0.0549	0.0013	324.961	6.9	313.387	4.4787	383	54	313.387	4.4787
Hatton Tuff_14	116.8	1.853	0.387422	0.01	0.0492313	0.00065	0.23739	20.1939	0.265065	0.0571	0.0016	332.687	7.5	309.801	4.05557	458	59	309.801	4.05557
Hatton Tuff_15	145	2.051	0.380687	0.0086	0.0499502	0.00064	0.26426	19.9521	0.254776	0.0553	0.0013	327.743	6.5	314.216	3.986	407	50	314.216	3.986
Hatton Tuff_16	184	2.626	0.372022	0.0093	0.0506448	0.00077	0.35936	19.7316	0.29979	0.0533	0.0014	321.347	7.2	318.479	4.7986	325	57	318.479	4.7986
Hatton Tuff_17	155.7	2.271	0.389658	0.013	0.0511272	0.00073	0.32843	19.497	0.277496	0.0553	0.0017	334.323	9.2	321.438	4.55798	390	67	321.438	4.55798
Hatton Tuff_18	334	1.324	0.379075	0.0061	0.0501833	0.00054	0.29111	19.8728	0.213261	0.05481	0.00091	326.556	4.5	315.647	3.35612	389	37	315.647	3.35612
Hatton Tuff_19	135.9	2.149	0.378942	0.0084	0.0508241	0.00054	0.19762	19.6425	0.208347	0.0541	0.0012	326.458	6.3	319.579	3.37331	362	50	319.579	3.37331
Hatton Tuff_20	164.9	1.944	0.378282	0.0079	0.0499963	0.00051	0.25332	19.9442	0.202862	0.0549	0.0012	325.972	6.1	314.499	3.18706	387	47	314.499	3.18706
Hatton Tuff_21	143.6	2.464	0.376087	0.008	0.0504412	0.0006	0.16367	19.7902	0.234992	0.0541	0.0012	324.353	6	317.23	3.74105	349	49	317.23	3.74105
Hatton Tuff_22	140.3	2.394	0.372773	0.0091	0.0501822	0.00053	0.052438	19.8965	0.209812	0.0539	0.0014	321.903	6.8	315.64	3.32577	347	57	315.64	3.32577
Hatton Tuff_23	110.5	2.125	0.37804	0.01	0.0507031	0.00067	0.17785	19.6889	0.259728	0.0541	0.0015	325.794	7.3	318.837	4.18612	346	60	318.837	4.18612
Hatton Tuff_24	253.1	1.355	0.374195	0.0084	0.0496369	0.00063	0.31322	20.0924	0.254335	0.0547	0.0013	322.954	6.2	312.292	3.92796	380	51	312.292	3.92796
Hatton Tuff_25	203.7	1.652	0.369455	0.0073	0.0501074	0.00061	0.25454	19.9362	0.242446	0.0535	0.0011	319.444	5.4	315.181	3.80071	335	46	315.181	3.80071
Hatton Tuff_26	48.6	2.585	1.47543	0.032	0.149939	0.0024	0.48103	6.64894	0.1061	0.0714	0.0013	920.919	13	900.622	14.0068	965	41	900.622	14.0068
Hatton Tuff_27	204.2	1.91	0.378326	0.0087	0.0500934	0.00058	0.25536	19.9084	0.22988	0.0548	0.0013	326.005	6.4	315.095	3.6211	382	51	315.095	3.6211
Hatton Tuff_28	168.7	2.13	0.37542	0.0083	0.0501662	0.00078	0.30144	19.8926	0.308657	0.0543	0.0012	323.86	6.1	315.542	4.84611	363	51	315.542	4.84611
Hatton Tuff_29	154.6	2.106	0.39848	0.0084	0.0512651	0.00051	0.080873	19.4175	0.19229	0.0564	0.0013	340.753	6.1	322.284	3.18739	446	50	322.284	3.18739
Hatton Tuff_30	187	1.81	0.377673	0.0073	0.0499158	0.00061	0.33228	19.976	0.243416	0.0549	0.001	325.523	5.4	314.005	3.78989	394	42	314.005	3.78989
Hatton Tuff_31	143.5	2.201	0.366195	0.0091	0.0499454	0.00065	0.1065	20.008	0.260208	0.0532	0.0014	317.023	6.8	314.186	4.06306	310	60	314.186	4.06306
Hatton Tuff_32	135.4	2.397	0.399945	0.0085	0.0521938	0.00067	0.2696	19.0949	0.244292	0.0556	0.0012	341.816	6.2	327.976	4.16074	407	48	327.976	4.16074
Hatton Tuff_33	129.1	1.91	0.402101	0.011	0.0499593	0.00061	0.38776	19.8689	0.240811	0.0584	0.0015	343.38	8.2	314.271	3.79969	512	55	314.271	3.79969
Hatton Tuff_34	103.5	2.85	0.3741	0.012	0.0500821	0.00072	0.083954	19.9283	0.285938	0.0542	0.0019	322.884	8.7	315.025	4.51626	364	75	315.025	4.51626
Hatton Tuff_35	163.2	1.392	0.382834	0.012	0.0502318	0.00066	0.27059	19.8413	0.259826	0.0553	0.0016	329.322	8.6	315.945	4.12519	397	64	315.945	4.12519
Hatton Tuff_36	179	1.944	0.36928	0.006	0.04986	0.00048	0.24559	20.028	0.192539	0.05374	0.00093	319.314	4.5	313.662	2.9931	342	38	313.662	2.9931
Hatton Tuff_37	147.4	2.15	0.377681	0.0089	0.0504684	0.00055	0.23963	19.7746	0.215068	0.0543	0.0013	325.529	6.5	317.396	3.43973	354	52	317.396	3.43973
Hatton Tuff_38	118.7	2.395	0.379894	0.0087	0.0508578	0.00055	0.013029	19.6271	0.211872	0.0542	0.0013	327.159	6.4	319.786	3.44002	349	54	319.786	3.44002
Hatton Tuff_39	271	1.53	0.421737	0.012	0.0486503	0.0008	0.13884	20.2799	0.329018	0.0629	0.0017	357.51	8.5	306.23	4.94092	685	60	306.23	4.94092
Hatton Tuff_40	235.4	1.283	0.372212	0.0093	0.0496462	0.0006	0.057519	20.0965	0.242321	0.0544	0.0015	321.488	7.1	312.349	3.75729	356	61	312.349	3.75729
Hatton Tuff_41	115.8	2.266	0.37689	0.0088	0.0507365	0.00061	0.07985	19.6812	0.236282	0.0539	0.0014	324.945	6.5	319.041	3.8142	336	55	319.041	3.8142
Hatton Tuff_42	178.5	1.595	0.436549	0.012	0.0495708	0.00056	0.058466	19.8807	0.221336	0.0639	0.0018	368.04	8.2	311.886	3.49605	708	59	311.886	3.49605
Hatton Tuff_43	147.1	1.547	0.374297	0.0075	0.050481	0.00059	0.33226	19.7824	0.230892	0.0538	0.001	323.03	5.5	317.474	3.67141	339	43	317.474	3.67141
Hatton Tuff_44	121	2.079	0.403617	0.0091	0.0540336	0.00063	0.44475	18.4843	0.215251	0.0542	0.0011	344.478	6.5	339.238	3.91571	358	46	339.238	3.91571
Hatton Tuff_45	61.7	2.718	0.362392	0.0099	0.0493339	0.00056	0.02841	20.2511	0.22966	0.0533	0.0016	314.191	7.4	310.431	3.52475	302	64	310.431	3.52475
Hatton Tuff_46	201.7	1.495	0.370604	0.012	0.0497058	0.00074	0.23688	20.0803	0.298382	0.0541	0.0017	320.296	8.9	312.715	4.62664	345	70	312.715	4.62664
Hatton Tuff_47	230.4	1.75	0.385942	0.01	0.0518588	0.00069	0.29533	19.2567	0.255866	0.054	0.0014	331.603	7.4	325.924	4.30248	342	57	325.924	4.30248
Hatton Tuff_48	113.3	3.1	0.38399	0.018	0.0501117	0.0013	0.30904	19.8807	0.513816	0.0556	0.0022	330.171	13	315.207	8.0721	431	96	315.207	8.0721
Hatton Tuff_49	161.7	1.37	0.365094	0.0096	0.04739	0.0007	0.23744	21.004	0.308817	0.0559	0.0016	316.203	7.1	298.477	4.36792	421	62	298.477	4.36792
Hatton Tuff_50	69.9	1.4	1.34428	0.045	0.143021	0.003	0.22882	6.98812	0.146502	0.0682	0.0024	865.611	19	861.721	17.71	852	73	861.721	17.71
Hatton Tuff_51	61.1	1.876	0.395843	0.012	0.0518451	0.00061	0.20642	19.2271	0.225505	0.0554	0.0016	338.835	8.6	325.839	3.82012	391	64	325.839	3.82012
Hatton Tuff_52	380	1.819	0.429309	0.012	0.0496026	0.00076	0.10602	19.8965	0.300863	0.0628	0.0019	362.907	8.6	312.082	4.71069	684	64	312.082	4.71069
Hatton Tuff_53	146.3	2.321	0.367773	0.0093	0.0499727	0.0005	0.1134	19.992	0.19984	0.0534	0.0014	318.196	7	314.354	3.14485	321	58	314.354	3.14485
Hatton Tuff_54	226	2.136	0.377799	0.0092	0.0503913	0.00073	0.32659	19.802	0.286246	0.0544	0.0013	325.616	7.1	316.924	4.54214	377	55	316.924	4.54214
Hatton Tuff_55	58.9	1.812	0.739684	0.029	0.0865663	0.0014	0.25507	11.4942	0.184965	0.062	0.0022	562.564	16	535.198	8.54473	649	78	535.198	8.54473
Hatton Tuff_56	148.3	2.368	0.366805	0.0094	0.0476974	0.0006	0.14958	20.8725	0.261396	0.0558	0.0015	317.476	6.9	300.369	3.75139	412	58	300.369	3.75139
Hatton Tuff_57	143.7	2.041	0.368055	0.0086	0.0497316	0.00056	0.24916	20.0803	0.225803	0.0537	0.0012	318.405	6.4	312.873	3.49813	340	52	312.873	3.49813
Hatton Tuff_58	143.1	1.537	0.391078	0.0095	0.0516875	0.00063	0.077519	19.2976	0.23461	0.0549	0.0014	335.361	6.9	324.873	3.93116	373	58	324.873	3.93116
Hatton Tuff_59	179.7	2.34	0.380445	0.01	0.0510256	0.00078	0.48156	19.5656	0.298595	0.0541	0.0013	327.565	7.6	320.815	4.85008	359	54	320.815	4.85008
Hatton Tuff_60	163.5	2.305	0.371781	0.0078	0.0505173	0.00047	0.094706	19.7785	0.183859	0.0534	0.0012	321.168	5.8	317.697	2.94828	330	48	317.697	2.94828
Hatton Tuff_61	137.8	1.93	0.41761	0.012	0.0497563	0.00053	0.53396	19.8847	0.209562	0.0609	0.0014	354.557	8.4	313.025	3.2978	602	50	313.025	3.2978
Hatton Tuff_62	271	1.767	0.389433	0.017	0.0489723	0.0011	0.26616	20.284	0.452584	0.0577	0.0026	334.159	13	308.209	6.85186	469	95	308.209	6.85186
Hatton Tuff_63	190	2.169	0.370934	0.01	0.0500274	0.00071	0.30036	19.9601	0.282867	0.0538	0.0015	320.541	7.4	314.69	4.43317	337	62	314.69	4.43317
Hatton Tuff_64	174.9	2.623	0.371986	0.01	0.0496159	0.00068	0.52884	20.1086	0.274962	0.0544	0.0013	321.32	7.7	312.163	4.23615	370	54	312.163	4.23615
Hatton Tuff_65	181	1.853	0.463105	0.016	0.0503033	0.00078	0.46748	19.5198	0.297198	0.0668	0.002	386.65	11	316.384	4.81441	803	65	316.384	4.81441
Hatton Tuff_66	24.08	2.137	2.06395	0.053	0.19005	0.0024	0.24093	5.24934	0.0661335	0.0788	0.0019	1137.62	17	1121.65	13.9635	1148	50	1148	50
Hatton Tuff_67	130.4	3.282	0.415461	0.013	0.0517967	0.00082	0.35146	19.1755	0.301512	0.0582	0.0019	353.016	9.7	325.543	5.1008	515	73	325.543	5.1008
Hatton Tuff_68	157.1	1.587	0.383296	0.011	0.0500212	0.00065	0.027068	19.9164	0.25783	0.0556	0.0017	329.662	8	314.652	4.06925	406	67	314.652	4.06925
Hatton Tuff_69	191.3	1.834	0.395229	0.015	0.0494442	0.00061	0.44206	20.0844	0.246063	0.058	0.0021	338.388	11	311.108	3.84601	494	79	311.108	3.84601
Hatton Tuff_70	216.3	2.422	0.376389	0.0096	0.0507632	0.00074	0.16511	19.6734	0.286412	0.0538	0.0015	324.576	7.1	319.206	4.6164	337	60	319.206	4.6164
Hatton Tuff_71	265	2.677	0.383109	0.013	0.0503591	0.00074	0.12558	19.7941	0.289938	0.0552	0.0019	329.524	9.2	316.726	4.63255	395	75	316.726	4.63255
Hatton Tuff_72	454	1.263	0.37175	0.0058	0.0502684	0.00046	0.27308	19.8689	0.181595	0.05366	0.00086	321.146	4.2	316.169	2.86684	341	36	316.169	2.86684
Hatton Tuff_73	83.6	3.96	0.414443	0.026	0.0534134	0.00095	0.2348	18.6463	0.3303	0.0563	0.0029	352.284	18	335.444	5.97665	440	120	335.444	5.97665
Hatton Tuff_74	156.7	2.741	0.37482	0.0091	0.0505515	0.00055	0.09044	19.755	0.214644	0.0538	0.0014	323.416	6.7	317.907	3.44816	330	58	317.907	3.44816
Hatton Tuff_75	120.8	2.391	0.370198	0.014	0.047208	0.00092	0.1431	21.0571	0.407928	0.0569	0.0023	319.995	10	297.358	5.74456	446	86	297.358	5.74456
Hatton Tuff_76	212.4	2.17	0.384154	0.0082	0.0517143	0.00056	0.19231	19.3125	0.208864	0.0539	0.0013	330.291	6	325.038	3.50206	341	51	325.038	3.50206
Hatton Tuff_77	233	1.888	0.372851	0.0067	0.0508532	0.00055	0.22965	19.6541	0.212456	0.0532	0.001	321.961	5	319.758	3.4278	314	42	319.758	3.4278
Hatton Tuff_78	126.2	2.061	0.376116	0.0091	0.0505384	0.00065	0.14251	19.755	0.25367	0.054	0.0014	324.374	6.7	317.826	4.05861	336	56	317.826	4.05861
Hatton Tuff_79	275	1.484	0.388237	0.0085	0.051879	0.00057	0.28496	19.2419	0.211042	0.0543	0.0011	333.284	6.1	326.047	3.54982	367	47	326.047	3.54982
Hatton Tuff_80	219.3	2.332	0.374702	0.0068	0.0509428	0.00049	0.21784	19.6155	0.188537	0.05337	0.00098	323.33	5.1	320.307	3.05761	328	42	320.307	3.05761
Hatton Tuff_81	248.1	1.993	0.381134	0.012	0.0502816	0.00069	0.2264	19.8295	0.271313	0.055	0.0018	328.072	9	316.25	4.32249	385	70	316.25	4.32249
Hatton Tuff_82	183.7	2.093	0.37488	0.0097	0.0494566	0.00079	0.13603	20.1572	0.320988	0.055	0.0016	323.461	7.1	311.184	4.92235	378	63	311.184	4.92235
Hatton Tuff_83	262.9	6.38	0.596148	0.011	0.0760214	0.00067	0.18355	13.1475	0.115814	0.0569	0.0011	475.076	6.9	472.331	4.12561	472	42	472.331	4.12561
Hatton Tuff_84	161.5	2.304	0.372925	0.013	0.0508633	0.00064	0.12262	19.6502	0.247124	0.0532	0.0019	322.015	9.6	319.819	4.03473	308	76	319.819	4.03473
Hatton Tuff_85	162.1	2.648	0.386337	0.0091	0.0522018	0.00055	0.14063	19.1388	0.201461	0.0537	0.0013	331.892	6.6	328.025	3.44169	325	54	328.025	3.44169
Hatton Tuff_86	206.3	2.1	0.383342	0.0078	0.0517009	0.00048	0.2409	19.3199	0.179165	0.0538	0.0011	329.695	5.7	324.956	3.00125	346	45	324.956	3.00125
Hatton Tuff_87	149.8	2.091	0.379543	0.0095	0.0502544	0.00061	0.3525	19.8452	0.240238	0.0548	0.0013	326.901	7	316.083	3.80452	375	51	316.083	3.80452
Hatton Tuff_88	146.6	1.55	0.381046	0.013	0.0511062	0.00061	0.0001	19.5351	0.232788	0.0541	0.0019	328.007	9.2	321.31	3.84875	349	79	321.31	3.84875
Hatton Tuff_89	256	2.133	0.37689	0.0084	0.0507365	0.00085	0.49833	19.6812	0.329246	0.0539	0.0011	324.945	6.2	319.041	5.27485	352	45	319.041	5.27485
Hatton Tuff_90	87.8	2.763	0.419536	0.01	0.0542625	0.00075	0.13585	18.3621	0.252875	0.0561	0.0014	355.936	7.2	340.638	4.65515	419	57	340.638	4.65515
Hatton Tuff_91	208.9	2.025	0.378238	0.012	0.0506361	0.00086	0.32988	19.7122	0.334171	0.0542	0.0017	325.94	9.1	318.426	5.36023	352	69	318.426	5.36023
Hatton Tuff_92	83.8	1.953	0.38741	0.014	0.0482995	0.00097	0.27681	20.5508	0.409664	0.0582	0.0021	332.679	10	304.073	6.02833	499	81	304.073	6.02833
Hatton Tuff_93	198.8	2.87	0.386439	0.011	0.0508889	0.00064	0.25982	19.5925	0.245674	0.0551	0.0015	331.967	8.1	319.977	3.99772	391	62	319.977	3.99772
Hatton Tuff_94	166	1.572	0.387924	0.0079	0.0503535	0.00049	0.15385	19.7785	0.191682	0.0559	0.0011	333.055	5.7	316.691	3.05507	422	43	316.691	3.05507
Hatton Tuff_95	214	2.166	0.382604	0.0086	0.0502016	0.00059	0.13527	19.8531	0.232546	0.0553	0.0013	329.153	6.3	315.76	3.67993	394	53	315.76	3.67993
Hatton Tuff_96	114.1	4.57	1.43504	0.026	0.150037	0.0013	0.29235	6.66223	0.0577008	0.0694	0.0012	904.205	11	901.172	7.68739	897	37	901.172	7.68739
Hatton Tuff_97	404	1.375	0.538069	0.019	0.0521952	0.001	0.075613	18.622	0.346778	0.0748	0.0029	437.417	12	327.985	6.13974	1040	76	327.985	6.13974
Hatton Tuff_98	174.6	2.491	0.386437	0.0094	0.0507046	0.00053	0.18203	19.6579	0.204811	0.0553	0.0013	331.966	6.8	318.846	3.3135	393	54	318.846	3.3135
Hatton Tuff_99	210.3	2.86	0.394201	0.017	0.0489777	0.00075	0.48155	20.2634	0.307955	0.0584	0.0024	337.639	12	308.242	4.7108	499	82	308.242	4.7108
Hatton Tuff_100	71.1	3.46	0.389211	0.011	0.0503404	0.00069	0.13188	19.7785	0.26992	0.0561	0.0017	333.996	8.1	316.611	4.31017	418	67	316.611	4.31017
Hatton Tuff_101	204.5	2.001	0.376457	0.0085	0.0511527	0.00053	0.29391	19.5351	0.202258	0.0534	0.0012	324.626	6.2	321.594	3.31485	327	49	321.594	3.31485
Hatton Tuff_102	198	2.369	0.372024	0.0081	0.0500814	0.00044	0.18575	19.9362	0.174879	0.0539	0.0012	321.348	6	315.021	2.76359	339	50	315.021	2.76359
Hatton Tuff_103	182.7	1.664	0.384242	0.01	0.051063	0.00071	0.16208	19.5389	0.271055	0.0546	0.0015	330.356	7.4	321.044	4.42791	364	60	321.044	4.42791
L Mud Creek
Lower Mud Creek-1	495	1.005	0.429363	0.02	0.0517514	0.00073	0.20266	19.1424	0.267495	0.0602	0.0029	362.945	14	325.266	4.63425	532	99	325.266	4.63425
Lower Mud Creek-2	739	1.775	0.397568	0.014	0.051513	0.00068	0.0001	19.3349	0.25421	0.056	0.0022	340.09	10	323.804	4.28819	396	83	323.804	4.28819
Lower Mud Creek-3	301.3	1.745	0.37878	0.013	0.0505222	0.00062	0.014481	19.7511	0.241867	0.0544	0.002	326.339	9.8	317.727	3.91555	323	79	317.727	3.91555
Lower Mud Creek-4	207.5	1.368	0.408736	0.015	0.0543181	0.00078	0.29622	18.379	0.263474	0.0546	0.0019	348.177	11	340.978	4.87887	339	73	340.978	4.87887
Lower Mud Creek-5	446	1.084	0.371438	0.012	0.0502824	0.00076	0.14572	19.8649	0.299907	0.0536	0.0017	320.914	8.5	316.255	4.75157	321	71	316.255	4.75157
Lower Mud Creek-6	176	1.547	0.374695	0.013	0.0497943	0.00063	0.10734	20.0321	0.252808	0.0546	0.0019	323.325	9.6	313.259	3.96667	342	75	313.259	3.96667
Lower Mud Creek-7	364	1.554	0.433102	0.015	0.0500409	0.00068	0.0001	19.7239	0.264541	0.0628	0.0024	365.6	11	314.773	4.26984	625	80	314.773	4.26984
Lower Mud Creek-8	50.7	1.96	0.407005	0.02	0.0538907	0.0012	0.27374	18.5185	0.411523	0.0548	0.0025	346.928	15	338.364	7.47609	350	100	338.364	7.47609
Lower Mud Creek-9	176	1.55	0.377665	0.014	0.0517041	0.00064	0.012892	19.3386	0.239349	0.053	0.0021	325.517	10	324.975	4.05292	272	82	324.975	4.05292
Lower Mud Creek-10	437	1.032	0.40886	0.018	0.0510614	0.00065	0.027059	19.4515	0.245934	0.0581	0.0025	348.266	12	321.035	4.12556	469	92	321.035	4.12556
Lower Mud Creek-11	185.6	1.31	0.469938	0.026	0.0506663	0.00079	0.048697	19.3686	0.296362	0.0673	0.0037	391.384	18	318.611	5.03624	770	110	318.611	5.03624
Lower Mud Creek-12	207.9	1.528	0.380004	0.013	0.051442	0.00065	0.22394	19.4213	0.24517	0.0536	0.0019	327.24	10	323.368	4.09387	318	76	323.368	4.09387
Lower Mud Creek-13	507	2.528	0.429704	0.013	0.053116	0.0012	0.37537	18.6916	0.419251	0.0587	0.0019	363.188	9.4	333.624	7.40904	547	74	333.624	7.40904
Lower Mud Creek-14	384	1.063	0.386709	0.011	0.0524475	0.00083	0.38671	19.0549	0.301363	0.0535	0.0015	332.165	8.3	329.53	5.16817	312	60	329.53	5.16817
Lower Mud Creek-15	672	1.084	0.38745	0.015	0.0513014	0.00082	0.3302	19.4439	0.310014	0.0548	0.002	332.708	11	322.507	5.12873	357	77	322.507	5.12873
Lower Mud Creek-16	172.4	1.571	0.378587	0.011	0.0500365	0.00058	0.19904	19.9283	0.230339	0.0549	0.0017	326.197	8.3	314.746	3.647	364	65	314.746	3.647
Lower Mud Creek-17	257	1.865	0.385598	0.013	0.0507782	0.00063	0.18512	19.6348	0.242881	0.0551	0.0019	331.351	9.9	319.298	3.96498	369	74	319.298	3.96498
Lower Mud Creek-18	232.5	1.487	0.39263	0.013	0.0517042	0.00054	0.20926	19.2864	0.200861	0.0551	0.0019	336.494	9.8	324.976	3.42298	369	76	324.976	3.42298
Lower Mud Creek-19	383	1.205	0.413144	0.014	0.0506377	0.00072	0.289	19.5848	0.276166	0.0592	0.0019	351.351	9.9	318.436	4.48903	528	67	318.436	4.48903
Lower Mud Creek-20	238.5	1.565	0.396045	0.018	0.0488721	0.00081	0.23756	20.2963	0.333672	0.0588	0.0027	338.982	13	307.593	5.09374	485	96	307.593	5.09374
Lower Mud Creek-21	490	1.037	0.393096	0.012	0.0521441	0.00069	0.11428	19.1351	0.252645	0.0547	0.0017	336.834	8.7	327.672	4.31711	376	71	327.672	4.31711
Lower Mud Creek-22	344	1.041	0.388211	0.013	0.0493317	0.00075	0.26884	20.1532	0.304613	0.0571	0.0018	333.265	9.7	310.417	4.67665	443	70	310.417	4.67665
Lower Mud Creek-23	303	1.263	0.388032	0.012	0.0515666	0.00072	0.18918	19.3498	0.26958	0.0546	0.0017	333.133	8.5	324.132	4.50067	349	66	324.132	4.50067
Lower Mud Creek-24	341	1.155	0.391587	0.013	0.0516606	0.0012	0.35529	19.305	0.447221	0.055	0.0018	335.733	9	324.709	7.44306	375	70	324.709	7.44306
Lower Mud Creek-25	195.5	1.648	0.398197	0.013	0.0502486	0.00059	0.032984	19.7785	0.230801	0.0575	0.002	340.547	9.7	316.048	3.7205	446	76	316.048	3.7205
Lower Mud Creek-26	461	1.122	0.411503	0.013	0.0491902	0.0008	0.17235	20.1167	0.323744	0.0607	0.002	350.17	9.2	309.548	4.97143	583	67	309.548	4.97143
Lower Mud Creek-27	209.1	1.541	0.396788	0.0099	0.050957	0.00057	0.23979	19.5312	0.217438	0.0565	0.0014	339.523	7.2	320.395	3.55844	440	54	320.395	3.55844
Lower Mud Creek-28	319	0.908	0.390817	0.013	0.0506384	0.00068	0.18913	19.6657	0.262983	0.056	0.0019	335.171	9.5	318.44	4.26357	406	74	318.44	4.26357
Lower Mud Creek-29	186	1.841	0.377884	0.014	0.0509648	0.00077	0.14576	19.5963	0.295692	0.0538	0.0021	325.679	11	320.442	4.83704	313	84	320.442	4.83704
Lower Mud Creek-30	390	1.167	0.39393	0.012	0.0518754	0.0007	0.14675	19.2234	0.258677	0.0551	0.0017	337.442	8.5	326.025	4.37595	373	66	326.025	4.37595
Lower Mud Creek-31	890	0.569	0.392757	0.011	0.0508897	0.00053	0.083799	19.5695	0.202971	0.056	0.0016	336.586	8.1	319.981	3.33226	412	66	319.981	3.33226
Lower Mud Creek-32	227	1.443	0.386562	0.012	0.0523297	0.00075	0.10707	19.0949	0.273462	0.0536	0.0017	332.057	8.8	328.809	4.68908	341	68	328.809	4.68908
Lower Mud Creek-33	527	1.9	0.375705	0.011	0.0492965	0.00066	0.13003	20.2143	0.269687	0.0553	0.0017	324.071	8.2	310.201	4.13171	380	68	310.201	4.13171
Lower Mud Creek-34	180.7	1.595	0.375226	0.012	0.0512735	0.0006	0.092305	19.497	0.228079	0.0531	0.0018	323.717	8.9	322.335	3.78472	288	71	322.335	3.78472
Lower Mud Creek-35	259.8	1.599	0.387878	0.014	0.0512646	0.00074	0.109	19.4552	0.280095	0.0549	0.002	333.021	9.8	322.281	4.64119	357	77	322.281	4.64119
Lower Mud Creek-36	184.4	1.665	0.399314	0.014	0.0516471	0.00069	0.20105	19.2827	0.256557	0.0561	0.0019	341.358	10	324.626	4.32403	412	74	324.626	4.32403
Lower Mud Creek-37	186	1.669	0.384218	0.013	0.0512475	0.00054	0.25327	19.4742	0.204792	0.0544	0.0017	330.338	9.4	322.176	3.40748	349	69	322.176	3.40748
Lower Mud Creek-38	154.5	2.035	0.430855	0.024	0.0513343	0.00085	0.26953	19.279	0.315927	0.0609	0.0032	364.005	16	322.709	5.37177	570	110	322.709	5.37177
Lower Mud Creek-39	428	1.311	0.380175	0.0089	0.0519497	0.00053	0.060283	19.2456	0.196308	0.0531	0.0013	327.366	6.5	326.481	3.32214	301	54	326.481	3.32214
Lower Mud Creek-40	179.7	1.159	0.380605	0.017	0.0505796	0.00092	0.2612	19.7239	0.357908	0.0546	0.0024	327.683	12	318.079	5.7661	364	96	318.079	5.7661
Lower Mud Creek-41	312	1.385	0.395706	0.011	0.0529745	0.00074	0.14038	18.8501	0.262943	0.0542	0.0015	338.735	8	332.758	4.61198	361	59	332.758	4.61198
Lower Mud Creek-42	210	1.591	0.373449	0.0097	0.0505546	0.00064	0.13941	19.7589	0.249866	0.0536	0.0015	322.403	7.2	317.925	4.00522	328	60	317.925	4.00522
Lower Mud Creek-43	861	0.959	0.401115	0.011	0.0507936	0.00065	0.10422	19.5733	0.249024	0.0573	0.0016	342.665	7.9	319.392	4.05417	488	60	319.392	4.05417
Lower Mud Creek-44	274	1.49	0.407852	0.013	0.0516467	0.0007	0.11328	19.253	0.259474	0.0573	0.002	347.539	9.3	324.623	4.38591	457	70	324.623	4.38591
Lower Mud Creek-45	216.3	1.474	0.377073	0.01	0.0515258	0.00059	0.11062	19.4024	0.222108	0.0531	0.0014	325.08	7.6	323.882	3.69527	310	60	323.882	3.69527
Lower Mud Creek-46	167.8	1.566	0.378499	0.014	0.0511429	0.0012	0.076859	19.5312	0.457764	0.0537	0.0021	326.132	10	321.534	7.46967	321	80	321.534	7.46967
Lower Mud Creek-47	398	1.262	0.382248	0.0096	0.0521348	0.00066	0.19588	19.1755	0.242681	0.0532	0.0014	328.891	7	327.615	4.12273	305	56	327.615	4.12273
Lower Mud Creek-48	359	1.123	0.388002	0.012	0.0503635	0.00063	0.16834	19.7746	0.246351	0.0559	0.0016	333.112	8.4	316.753	3.93943	418	65	316.753	3.93943
Lower Mud Creek-49	204	1.669	0.381966	0.014	0.0513245	0.00071	0.2254	19.4552	0.26874	0.054	0.0019	328.684	10	322.648	4.45652	329	72	322.648	4.45652
Lower Mud Creek-50	282	1.195	0.386353	0.0097	0.0502394	0.00073	0.13504	19.8255	0.286928	0.0558	0.0015	331.904	7	315.991	4.54432	413	59	315.991	4.54432
Lower Mud Creek-51	164.4	1.827	0.374488	0.012	0.0511726	0.00068	0.066299	19.5351	0.259501	0.0531	0.0018	323.171	8.7	321.717	4.27145	305	74	321.717	4.27145
Lower Mud Creek-52	373	1.592	0.379397	0.011	0.0493348	0.00086	0.48192	20.1857	0.350418	0.0558	0.0012	326.793	7.7	310.436	5.33015	436	52	310.436	5.33015
Lower Mud Creek-53	291	1.352	0.401074	0.012	0.0500891	0.00071	0.34891	19.8255	0.279067	0.0581	0.0017	342.636	8.9	315.068	4.42126	494	64	315.068	4.42126
Lower Mud Creek-54	454	1.297	0.391426	0.011	0.0492229	0.00079	0.083133	20.1816	0.321766	0.0577	0.0018	335.615	8.1	309.749	4.91688	483	67	309.749	4.91688
Lower Mud Creek-55	399	0.919	0.383614	0.0071	0.0511669	0.00056	0.27129	19.5046	0.21304	0.0544	0.0011	329.895	5.1	321.682	3.48872	374	44	321.682	3.48872
Lower Mud Creek-56	229.5	1.352	0.386561	0.012	0.0522321	0.00078	0.050564	19.1278	0.28538	0.0537	0.0019	332.056	9	328.211	4.88466	321	74	328.211	4.88466
Lower Mud Creek-57	224.6	1.499	0.381494	0.01	0.0516437	0.00056	0.11408	19.3461	0.209592	0.0536	0.0015	328.337	7.4	324.605	3.51684	314	59	324.605	3.51684
Lower Mud Creek-58	328	1.12	0.38407	0.011	0.0507612	0.00094	0.0001	19.6464	0.362821	0.0549	0.0019	330.229	8.1	319.193	5.85579	386	77	319.193	5.85579
Lower Mud Creek-59	169.6	1.82	0.397661	0.012	0.0519893	0.00071	0.0001	19.1718	0.260966	0.0555	0.0019	340.157	8.7	326.723	4.44858	388	73	326.723	4.44858
Lower Mud Creek-60	184.4	1.702	0.388349	0.013	0.0511405	0.00096	0.11683	19.497	0.364927	0.0551	0.0019	333.366	9.6	321.52	5.97624	401	78	321.52	5.97624
Lower Mud Creek-61	324	0.905	0.370292	0.014	0.0500339	0.00083	0.35138	19.9601	0.330676	0.0537	0.0019	320.065	11	314.73	5.19127	322	78	314.73	5.19127
Lower Mud Creek-62	177.5	1.404	0.400589	0.011	0.0515364	0.00069	0.20415	19.3162	0.25745	0.0564	0.0016	342.284	7.6	323.948	4.30182	431	62	323.948	4.30182
Lower Mud Creek-63	210.3	1.657	0.38487	0.012	0.0505905	0.00069	0.3713	19.7044	0.267903	0.0552	0.0016	330.817	9.2	318.146	4.3086	389	65	318.146	4.3086
Lower Mud Creek-64	151.2	1.753	0.382893	0.013	0.0516404	0.00072	0.0001	19.3424	0.269371	0.0538	0.002	329.365	9.6	324.585	4.52579	303	78	324.585	4.52579
Lower Mud Creek-65	196.9	1.617	0.375789	0.011	0.0510619	0.00077	0.16251	19.5695	0.294882	0.0534	0.0017	324.132	8.4	321.038	4.8134	299	67	321.038	4.8134
Lower Mud Creek-66	225	1.545	0.3905	0.012	0.0521813	0.00066	0.15431	19.1314	0.241568	0.0543	0.0017	334.939	8.7	327.9	4.13654	345	66	327.9	4.13654
Lower Mud Creek-67	351	1.433	0.389123	0.02	0.0499727	0.00098	0.0001	19.9124	0.388573	0.0565	0.0057	333.932	14	314.354	6.45712	400	160	314.354	6.45712
Lower Mud Creek-68	354	1.312	0.390728	0.015	0.0508995	0.0009	0.27074	19.5733	0.344803	0.0557	0.0019	335.105	11	320.042	5.6053	419	77	320.042	5.6053
Lower Mud Creek-69	371	1.45	0.380398	0.016	0.0518824	0.0012	0.40393	19.2678	0.445499	0.0532	0.002	327.53	12	326.068	7.46802	321	86	326.068	7.46802
Lower Mud Creek-70	335	1.51	0.382732	0.011	0.0511433	0.00059	0.080123	19.516	0.224716	0.0543	0.0016	329.247	8.1	321.537	3.70345	341	65	321.537	3.70345
Lower Mud Creek-71	197.9	1.387	0.431016	0.019	0.0469584	0.00089	0.53466	20.903	0.388873	0.0666	0.0026	364.119	14	295.821	5.51529	778	82	295.821	5.51529
Lower Mud Creek-72	309	1.955	0.372354	0.012	0.0502189	0.00079	0.17173	19.8847	0.312366	0.0538	0.0018	321.592	8.7	315.866	4.93986	328	71	315.866	4.93986
Lower Mud Creek-73	251	1.645	0.387381	0.01	0.0524406	0.00066	0.13642	19.0549	0.239638	0.0536	0.0015	332.657	7.7	329.488	4.12658	327	62	329.488	4.12658
Lower Mud Creek-74	194.8	1.772	0.392112	0.012	0.0514492	0.00063	0.047021	19.3761	0.236523	0.0553	0.0018	336.116	8.7	323.413	3.95667	372	70	323.413	3.95667
Lower Mud Creek-75	200.2	1.541	0.388392	0.012	0.050056	0.00069	0.16105	19.8847	0.272826	0.0563	0.0018	333.398	8.5	314.866	4.31569	419	69	314.866	4.31569
Lower Mud Creek-76	213.8	1.596	0.375291	0.012	0.0507093	0.00062	0.16689	19.6967	0.240535	0.0537	0.0017	323.764	9	318.875	3.89583	317	70	318.875	3.89583
Lower Mud Creek-77	184	2.14	1.55651	0.061	0.1518	0.0027	0.29313	6.5445	0.115642	0.0744	0.0026	953.663	23	911.047	15.8907	1037	72	911.047	15.8907
Lower Mud Creek-78	228	1.537	0.392693	0.014	0.0514325	0.00077	0.14654	19.3798	0.289195	0.0554	0.002	336.54	10	323.31	4.8207	388	80	323.31	4.8207
Lower Mud Creek-79	385	3.4	0.627296	0.027	0.0779388	0.0021	0.61522	12.8041	0.344284	0.0584	0.0019	494.711	16	483.808	12.7828	513	69	483.808	12.7828
Lower Mud Creek-80	82.4	1.043	1.14446	0.04	0.12544	0.0026	0.51169	7.95545	0.164552	0.0662	0.002	775.095	19	761.8	15.4227	789	60	761.8	15.4227
Lower Mud Creek-81	269.9	1.763	0.39835	0.013	0.0503555	0.00088	0.48482	19.7394	0.342888	0.0574	0.0016	340.658	9.1	316.704	5.45653	478	61	316.704	5.45653
Lower Mud Creek-82	316.6	1.508	0.390119	0.012	0.0505479	0.00072	0.2074	19.7005	0.27944	0.056	0.0016	334.66	8.4	317.885	4.48742	431	65	317.885	4.48742
Lower Mud Creek-83	234	1.687	0.436501	0.017	0.0526117	0.0011	0.38218	18.8324	0.390125	0.0602	0.0022	368.006	12	330.536	6.80359	571	79	330.536	6.80359
Lower Mud Creek-84	281	1.214	0.378629	0.012	0.0505021	0.00066	0.26589	19.7589	0.257674	0.0544	0.0016	326.228	8.4	317.603	4.12963	344	65	317.603	4.12963
Lower Mud Creek-85	510	0.796	0.379075	0.012	0.0500099	0.00077	0.28308	19.9362	0.306038	0.055	0.0017	326.556	8.9	314.583	4.80473	369	68	314.583	4.80473
Lower Mud Creek-86	263	1.449	0.386318	0.012	0.0519092	0.00071	0.13548	19.2382	0.262776	0.054	0.0018	331.878	9	326.233	4.44952	329	71	326.233	4.44952
Lower Mud Creek-87	211.9	1.637	0.382195	0.015	0.0499674	0.0008	0.16608	19.9402	0.318089	0.0555	0.0022	328.853	11	314.321	5.01624	369	85	314.321	5.01624
Lower Mud Creek-88	182.9	1.86	0.392581	0.016	0.0513252	0.001	0.24388	19.4175	0.377038	0.0555	0.0021	336.458	12	322.652	6.22853	426	91	322.652	6.22853
Lower Mud Creek-89	153.8	2.333	0.380045	0.012	0.0508779	0.00076	0.10956	19.6194	0.292539	0.0542	0.0018	327.27	8.7	319.909	4.75369	337	71	319.909	4.75369
Lower Mud Creek-90	188.5	1.709	0.383616	0.013	0.0515463	0.00065	0.0001	19.3723	0.243937	0.054	0.002	329.897	9.7	324.008	4.09999	314	79	324.008	4.09999
Lower Mud Creek-91	265	1.191	0.374991	0.014	0.0503873	0.00093	0.14064	19.8137	0.365104	0.054	0.0022	323.543	10	316.899	5.81856	330	85	316.899	5.81856
Lower Mud Creek-92	305	1.166	0.415059	0.017	0.0517465	0.0014	0.0001	19.1939	0.515766	0.0582	0.003	352.727	12	325.235	8.69364	460	110	325.235	8.69364
Lower Mud Creek-93	296	1.635	0.388204	0.015	0.0516841	0.00089	0.27889	19.3087	0.331817	0.0545	0.0021	333.259	11	324.853	5.56385	353	82	324.853	5.56385
Lower Mud Creek-94	430	1.155	0.407572	0.018	0.0498706	0.0011	0.032119	19.8807	0.434767	0.0593	0.0029	347.337	13	313.727	6.85702	530	100	313.727	6.85702
Lower Mud Creek-95	234	1.893	0.382128	0.013	0.0505967	0.00074	0.26922	19.7122	0.287542	0.0548	0.0019	328.803	9.6	318.184	4.63478	355	72	318.184	4.63478
Lower Mud Creek-96	194.1	1.884	0.378234	0.022	0.0496284	0.0013	0.36175	20.0803	0.524185	0.0553	0.0028	325.937	16	312.24	8.10551	400	110	312.24	8.10551
Lower Mud Creek-97	192	2.089	0.416929	0.027	0.0527041	0.0017	0.35255	18.8679	0.605198	0.0574	0.0036	354.069	19	331.102	10.5628	460	130	331.102	10.5628
Lower Mud Creek-98	311	1.269	0.403589	0.012	0.0510177	0.00071	0.29728	19.4856	0.269578	0.0574	0.0017	344.457	8.6	320.767	4.42471	463	63	320.767	4.42471
Lower Mud Creek-99	312	1.456	0.405029	0.023	0.0517406	0.0011	0.56909	19.2308	0.406805	0.0568	0.0026	345.499	16	325.199	6.85759	434	98	325.199	6.85759
Lower Mud Creek-100	309	1.211	0.405385	0.017	0.0479845	0.00081	0.002027	20.6016	0.343784	0.0613	0.0028	345.757	12	302.136	5.08544	586	97	302.136	5.08544
Lower Mud Creek-101	303	1.677	0.390985	0.017	0.0463556	0.0011	0.36995	21.322	0.500089	0.0612	0.0026	335.293	14	292.108	6.82447	623	97	292.108	6.82447
Lower Mud Creek-102	226	1.487	0.400018	0.014	0.0488638	0.00083	0.1081	20.284	0.341495	0.0594	0.0022	341.87	10	307.542	5.1741	543	82	307.542	5.1741
Lower Mud Creek-103	211.9	1.777	0.379384	0.02	0.0497792	0.00083	0.27093	20.02	0.332665	0.0553	0.0028	326.784	14	313.166	5.2453	370	110	313.166	5.2453
Lower Mud Creek-104	315	1.597	0.382053	0.014	0.0510527	0.00081	0.10571	19.5503	0.309595	0.0543	0.0021	328.748	11	320.981	5.07762	348	85	320.981	5.07762
Lower Mud Creek-105	133	2.067	0.391773	0.017	0.0522552	0.00087	0.021195	19.1022	0.317458	0.0544	0.0025	335.868	12	328.352	5.47149	312	97	328.352	5.47149
Lower Mud Creek-106	418	1.572	0.431708	0.018	0.056137	0.0012	0.041798	17.762	0.378586	0.0558	0.0027	364.61	13	352.09	7.47809	420	110	352.09	7.47809
Lower Mud Creek-107	228	1.719	0.379762	0.013	0.0506532	0.0008	0.19481	19.7005	0.310489	0.0544	0.0018	327.062	9.3	318.531	4.99707	345	73	318.531	4.99707
Lower Mud Creek-108	190.2	1.947	0.388733	0.016	0.0517546	0.00078	0.079925	19.2827	0.290021	0.0545	0.0024	333.647	12	325.285	4.91731	338	93	325.285	4.91731
Lower Mud Creek-109	397	1.325	0.367839	0.015	0.0469073	0.00068	0.12747	21.1909	0.305358	0.0569	0.0024	318.245	11	295.506	4.29364	429	91	295.506	4.29364
Lower Mud Creek-110	286	1.406	0.380259	0.013	0.0506265	0.00061	0.21075	19.7083	0.236935	0.0545	0.0018	327.428	9.4	318.367	3.83868	344	72	318.367	3.83868
Lower Mud Creek-111	264	1.559	0.387741	0.016	0.0508757	0.00082	0.064346	19.5925	0.314769	0.0553	0.0024	332.92	12	319.896	5.15394	373	95	319.896	5.15394
Lower Mud Creek-112	171.3	1.641	0.384887	0.013	0.0503193	0.0007	0.063341	19.802	0.274483	0.0555	0.0019	330.829	9.5	316.482	4.38754	386	77	316.482	4.38754
Lower Mud Creek-113	196.2	1.703	0.395009	0.014	0.0501077	0.00067	0.2537	19.8413	0.263763	0.0572	0.002	338.228	10	315.183	4.20413	437	74	315.183	4.20413
Lower Mud Creek-114	367	1.191	0.38962	0.011	0.05103	0.00063	0.04024	19.5312	0.240326	0.0554	0.0017	334.296	8.3	320.842	3.94867	378	68	320.842	3.94867
Lower Mud Creek-115	223.6	1.373	0.380173	0.0092	0.0500638	0.00059	0.16829	19.9124	0.233937	0.0551	0.0014	327.365	6.8	314.913	3.68677	381	56	314.913	3.68677
Upper Mud Creek
Upper Mud Creek-1	93.5	2.567	1.58044	0.028	0.159716	0.0015	0.25654	6.25391	0.0586671	0.0718	0.0013	963.129	11	955.196	8.82287	966	39	966	39
Upper Mud Creek-2	138	1.63	1.821	0.042	0.173173	0.0024	0.23821	5.75374	0.0794533	0.0763	0.0019	1053.69	16	1029.57	13.9957	1085	50	1085	50
Upper Mud Creek-3	42.6	1.236	1.95251	0.053	0.180705	0.0026	0.26351	5.50964	0.078926	0.0784	0.0021	1099.98	18	1070.83	15.1363	1133	55	1133	55
Upper Mud Creek-4	285	1.185	0.591028	0.014	0.0734327	0.00096	0.27952	13.5777	0.176981	0.0584	0.0014	471.812	8.9	456.804	5.8881	523	54	456.804	5.8881
Upper Mud Creek-5	714	3.94	0.540766	0.0092	0.0667308	0.00086	0.13947	14.9142	0.191294	0.0588	0.0012	439.197	6.1	416.43	5.2778	538	43	416.43	5.2778
Upper Mud Creek-6	54.2	1.764	2.16315	0.049	0.198178	0.0027	0.36156	5.04286	0.0686623	0.0792	0.0017	1170	16	1165.52	15.5937	1169	42	1169	42
Upper Mud Creek-7	377	1.63	0.630131	0.018	0.0758241	0.0013	0.31581	13.1234	0.223889	0.0603	0.0016	496.48	11	471.149	7.92699	603	61	471.149	7.92699
Upper Mud Creek-8	917	5.6	0.502135	0.017	0.0630357	0.0014	0.44608	15.7978	0.349398	0.0578	0.0017	413.398	11	394.061	8.5989	506	65	394.061	8.5989
Upper Mud Creek-9	561	1.455	0.449562	0.0071	0.0602178	0.00062	0.34576	16.6058	0.170966	0.05417	0.00089	377.202	5	376.95	3.83635	366	35	376.95	3.83635
Upper Mud Creek-10	90.1	0.661	0.87172	0.023	0.10024	0.0014	0.2497	9.94036	0.138335	0.0631	0.0017	636.889	12	615.816	8.45599	685	57	615.816	8.45599
Upper Mud Creek-11	90.4	1.814	1.65434	0.04	0.163987	0.0019	0.2278	6.08643	0.0703847	0.0732	0.0018	991.819	15	978.894	11.1926	997	51	997	51
Upper Mud Creek-12	151.1	0.933	4.072	0.077	0.283553	0.0038	0.48548	3.50263	0.0466199	0.1042	0.0018	1649.72	16	1609.23	21.5059	1691	32	1691	32
Upper Mud Creek-13	168	1.314	1.82453	0.037	0.177225	0.002	0.45744	5.64016	0.0636228	0.0747	0.0014	1054.96	13	1051.8	11.6443	1050	36	1050	36
Upper Mud Creek-14	151.4	2.744	1.6952	0.029	0.166896	0.0019	0.45111	5.98086	0.0679643	0.0737	0.0012	1007.34	12	994.988	11.0563	1023	34	1023	34
Upper Mud Creek-15	76.9	2.88	2.96452	0.08	0.23483	0.0047	0.3796	4.23191	0.0841725	0.0916	0.0024	1399.43	20	1359.76	26.6887	1444	49	1444	49
Upper Mud Creek-16	1110	5.16	0.525082	0.013	0.0618501	0.00076	0.20398	16.0179	0.194996	0.0616	0.0015	428.802	8.7	386.867	4.68423	630	50	386.867	4.68423
Upper Mud Creek-17	119	1.616	0.595139	0.015	0.0762949	0.001	0.29548	13.1062	0.171771	0.0566	0.0014	474.433	9.7	473.97	6.13819	460	56	473.97	6.13819
Upper Mud Creek-18	143.7	3.312	1.75729	0.038	0.169109	0.0023	0.30697	5.89275	0.0798664	0.0754	0.0017	1030.48	14	1007.2	13.4013	1062	46	1062	46
Upper Mud Creek-19	62.7	3.05	3.12152	0.058	0.241983	0.0031	0.35296	4.10509	0.0522405	0.0936	0.0017	1438.88	15	1397	17.6213	1486	35	1486	35
Upper Mud Creek-20	459	7.79	0.428858	0.0082	0.0573071	0.00082	0.38265	17.4368	0.249314	0.0543	0.001	362.587	5.9	359.227	5.0702	379	43	359.227	5.0702
Upper Mud Creek-21	292	1.177	0.600252	0.016	0.0664946	0.001	0.30269	14.8368	0.220131	0.0655	0.0015	477.685	9.9	415.002	6.09312	785	49	415.002	6.09312
Upper Mud Creek-22	377	0.813	0.560723	0.011	0.071883	0.00067	0.21014	13.8985	0.129423	0.0566	0.0011	452.272	6.9	447.49	4.13007	452	43	447.49	4.13007
Upper Mud Creek-23	114.8	1.943	3.2537	0.064	0.254678	0.003	0.30709	3.92157	0.0461361	0.0927	0.0018	1470.96	15	1462.56	17.189	1467	38	1467	38
Upper Mud Creek-24	495	1.91	0.53455	0.011	0.0676905	0.00077	0.52732	14.734	0.167161	0.0573	0.0011	435.09	7.3	422.227	4.73468	486	41	422.227	4.73468
Upper Mud Creek-25	176.9	3.62	1.73336	0.033	0.170191	0.0017	0.40335	5.86855	0.0585477	0.0739	0.0013	1021.62	12	1013.17	9.93289	1021	37	1021	37
Upper Mud Creek-26	939	1.826	0.585197	0.015	0.0720909	0.00088	0.17772	13.8179	0.168022	0.0589	0.0015	468.081	9.3	448.74	5.41391	561	57	448.74	5.41391
Upper Mud Creek-27	523	0.898	0.598742	0.011	0.059108	0.00086	0.28045	16.4935	0.23395	0.0735	0.0014	476.725	7.2	370.199	5.20528	1009	41	370.199	5.20528
Upper Mud Creek-28	728	2.82	0.566379	0.013	0.0720985	0.00081	0.19277	13.8504	0.155386	0.057	0.0014	455.948	8.3	448.786	4.99659	459	52	448.786	4.99659
Upper Mud Creek-29	62.3	1.597	0.581973	0.02	0.071938	0.0011	0.23664	13.8504	0.211017	0.0587	0.0021	466.012	13	447.821	6.79044	515	78	447.821	6.79044
Upper Mud Creek-30	970	2.119	0.68665	0.019	0.059102	0.0016	0.00091222	16.2602	0.423029	0.0843	0.0034	531.109	11	370.162	9.60937	1241	77	370.162	9.60937
Upper Mud Creek-31	407	2.12	2.09041	0.041	0.191999	0.0032	0.60745	5.1975	0.086445	0.079	0.0013	1146.36	14	1132.19	18.3448	1162	34	1162	34
Upper Mud Creek-32	639	1.562	0.557658	0.011	0.070864	0.00078	0.21848	14.0865	0.154775	0.0571	0.0011	450.275	6.9	441.359	4.79214	483	43	441.359	4.79214
Upper Mud Creek-33	928	5.29	0.504039	0.016	0.0583299	0.0012	0.0001	16.9491	0.344728	0.0627	0.0023	414.686	11	365.46	7.38486	677	83	365.46	7.38486
Upper Mud Creek-34	286	1.571	0.572639	0.014	0.0727677	0.00088	0.050976	13.7231	0.165724	0.0571	0.0016	460	9.3	452.809	5.43464	453	60	452.809	5.43464
Upper Mud Creek-35	74	2.9	1.66326	0.042	0.163308	0.0023	0.33103	6.10501	0.0857235	0.0739	0.0018	995.224	16	975.136	13.4504	1011	49	1011	49
Upper Mud Creek-36	509	6.06	0.536737	0.013	0.0676134	0.00076	0.15134	14.7449	0.165234	0.0576	0.0015	436.537	8.5	421.761	4.70417	477	56	421.761	4.70417
Upper Mud Creek-37	122	2.463	2.10916	0.045	0.195702	0.0023	0.29218	5.10986	0.0600546	0.0782	0.0016	1152.5	15	1152.19	13.3369	1134	42	1134	42
Upper Mud Creek-38	344.4	6.63	0.533092	0.0098	0.0684375	0.00082	0.3081	14.59	0.174552	0.05652	0.00098	434.124	6.4	426.735	5.03405	454	39	426.735	5.03405
Upper Mud Creek-39	323	1.144	0.388286	0.009	0.0496019	0.00058	0.22413	20.0521	0.233211	0.0568	0.0013	333.32	6.6	312.077	3.61248	452	52	312.077	3.61248
Upper Mud Creek-40	177.5	1.674	0.595132	0.014	0.0751	0.00092	0.24855	13.2961	0.162643	0.0575	0.0014	474.429	9.3	466.808	5.65179	473	54	466.808	5.65179
Upper Mud Creek-41	601	4.62	1.8372	0.037	0.15984	0.002	0.31514	6.15385	0.0757396	0.0834	0.0017	1059.5	13	955.886	11.5902	1261	40	1261	40
Upper Mud Creek-42	133.3	24.4	3.32593	0.12	0.254029	0.0043	0.13706	3.9185	0.0660248	0.095	0.0037	1488.06	29	1459.22	25.0939	1500	72	1500	72
Upper Mud Creek-43	665	6.88	0.639642	0.016	0.0747377	0.0013	0.68555	13.2802	0.229273	0.0621	0.0011	502.391	10	464.636	7.88178	672	40	464.636	7.88178
Upper Mud Creek-44	251	0.98	1.91674	0.041	0.178763	0.0019	0.33845	5.57103	0.0589691	0.0778	0.0016	1087.6	14	1060.21	11.0856	1118	41	1118	41
Upper Mud Creek-45	631	5.07	0.771333	0.034	0.0797258	0.0024	0.46222	12.3305	0.364896	0.0702	0.0021	580.881	20	494.486	14.3764	919	63	494.486	14.3764
Upper Mud Creek-46	858	2.17	0.507517	0.0096	0.0630567	0.00075	0.2919	15.7803	0.186764	0.0584	0.0011	417.032	6.4	394.188	4.61341	522	41	394.188	4.61341
Upper Mud Creek-47	404	57	1.38449	0.032	0.144752	0.0016	0.29383	6.89655	0.0760999	0.0694	0.0016	882.893	14	871.48	9.48898	881	47	871.48	9.48898
Upper Mud Creek-48	168	0.833	0.579296	0.016	0.0712431	0.0009	0.16495	13.9782	0.175851	0.059	0.0016	464.292	10	443.641	5.54292	546	63	443.641	5.54292
Upper Mud Creek-49	312	2.257	0.589295	0.013	0.074623	0.00089	0.34549	13.3833	0.15941	0.0573	0.0012	470.704	8.1	463.948	5.45696	476	46	463.948	5.45696
Upper Mud Creek-50	237.2	1.9	0.580932	0.014	0.072551	0.00097	0.42264	13.7457	0.183276	0.0581	0.0013	465.344	9.2	451.506	5.94437	504	51	451.506	5.94437
Upper Mud Creek-51	765	4.76	0.428368	0.0098	0.056823	0.00067	0.21591	17.5747	0.206943	0.0547	0.0013	362.238	6.9	356.276	4.16645	370	52	356.276	4.16645
Upper Mud Creek-52	121.1	2.204	3.24412	0.069	0.256697	0.0026	0.18785	3.89864	0.0395183	0.0917	0.002	1468.67	17	1472.92	15.1235	1438	42	1438	42
Upper Mud Creek-53	146.4	1.292	3.28787	0.057	0.261873	0.0036	0.29206	3.83142	0.0528471	0.0911	0.0017	1479.09	13	1499.42	20.5498	1437	35	1437	35
Upper Mud Creek-54	105.5	5.16	1.7049	0.03	0.169229	0.0018	0.31343	5.90667	0.0627999	0.0731	0.0013	1010.99	11	1007.86	10.5118	998	36	998	36
Upper Mud Creek-55	247	2.028	0.592655	0.02	0.0754433	0.0014	0.41369	13.245	0.245603	0.057	0.0014	472.85	10	468.867	8.55246	473	53	468.867	8.55246
Upper Mud Creek-56	394	2.16	0.540462	0.025	0.060239	0.0013	0.0089352	16.3666	0.348226	0.0651	0.0029	438.996	16	377.079	8.00613	716	93	377.079	8.00613
Upper Mud Creek-57	94.2	0.545	1.41967	0.048	0.142084	0.0023	0.41673	6.99301	0.112475	0.0725	0.0021	897.772	20	856.434	13.5517	983	59	856.434	13.5517
Upper Mud Creek-58	66.6	1.22	1.71543	0.069	0.162494	0.0033	0.32102	6.11247	0.123296	0.0766	0.0029	1014.93	25	970.621	19.3043	1050	79	1050	79
Upper Mud Creek-59	483	1.051	0.58452	0.013	0.0742776	0.00096	0.26515	13.4481	0.173617	0.0571	0.0013	467.647	8.1	461.875	5.8886	466	48	461.875	5.8886
Upper Mud Creek-60	152.9	0.964	2.80678	0.051	0.23143	0.0028	0.50866	4.31034	0.0520214	0.088	0.0015	1358.18	14	1341.99	15.9832	1368	32	1368	32
Upper Mud Creek-61	140.7	2.438	1.95245	0.047	0.18789	0.0022	0.30625	5.33049	0.0625111	0.0754	0.0017	1099.96	16	1109.93	12.8397	1054	47	1054	47
Upper Mud Creek-62	466	9.73	0.440578	0.0087	0.0588731	0.00061	0.18101	16.9779	0.175833	0.0543	0.0011	370.886	6.1	368.769	3.78828	363	46	368.769	3.78828
Upper Mud Creek-63	809	0.628	0.948707	0.03	0.0568437	0.00081	0.20797	16.0668	0.209096	0.1211	0.0036	677.842	15	356.402	4.91279	1950	52	356.402	4.91279
Upper Mud Creek-64	410	3.46	0.609357	0.012	0.0757099	0.0011	0.33573	13.1752	0.190945	0.0584	0.0012	483.449	7.6	470.465	6.71332	529	44	470.465	6.71332
Upper Mud Creek-65	952	2.63	0.623894	0.038	0.0629617	0.0015	0.0057968	15.528	0.361676	0.0719	0.0046	492.585	23	393.612	9.30112	890	130	393.612	9.30112
Upper Mud Creek-66	113.5	1.414	2.786	0.051	0.233161	0.0029	0.28926	4.28817	0.0533262	0.0867	0.0017	1352.61	14	1351.04	16.6313	1339	38	1339	38
Upper Mud Creek-67	336	1.925	0.375748	0.008	0.0514416	0.00059	0.24114	19.4364	0.222885	0.053	0.0012	324.102	5.9	323.366	3.68397	306	48	323.366	3.68397
Upper Mud Creek-68	106.8	2.657	1.85219	0.041	0.181369	0.0021	0.30182	5.52181	0.0640298	0.0741	0.0016	1064.86	15	1074.45	12.2662	1017	44	1017	44
Upper Mud Creek-69	89.4	1.14	1.66907	0.041	0.165446	0.0021	0.2717	6.035	0.0764847	0.0732	0.0019	997.439	15	986.972	12.3491	984	50	984	50
Upper Mud Creek-70	288	1.128	0.384751	0.0087	0.0491502	0.00067	0.176	20.2347	0.274328	0.0568	0.0014	330.729	6.3	309.302	4.16783	449	53	309.302	4.16783
Upper Mud Creek-71	169	1.227	0.720264	0.02	0.087541	0.0014	0.30593	11.4025	0.182024	0.0597	0.0016	551.159	12	540.978	8.50517	567	60	540.978	8.50517
Upper Mud Creek-72	288	0.844	3.08607	0.053	0.241297	0.0026	0.28299	4.12031	0.0441402	0.0928	0.0016	1430.11	13	1393.43	14.852	1474	33	1474	33
Upper Mud Creek-73	167.8	1.515	0.673908	0.02	0.0689682	0.00096	0.17877	14.2106	0.193863	0.0709	0.0021	523.405	12	429.936	5.8682	923	64	429.936	5.8682
Upper Mud Creek-74	289.5	3.915	1.89344	0.039	0.177502	0.0026	0.56418	5.61167	0.0818762	0.0774	0.0013	1079.45	14	1053.32	14.9878	1134	36	1134	36
Upper Mud Creek-75	29.6	0.648	1.5779	0.049	0.14869	0.0028	0.25578	6.65336	0.123948	0.077	0.0026	962.127	20	893.615	16.4077	1079	72	893.615	16.4077
Upper Mud Creek-76	212.3	0.764	2.28532	0.049	0.192592	0.0022	0.27049	5.13347	0.0579755	0.0861	0.0018	1208.5	15	1135.4	12.7074	1326	40	1326	40
Upper Mud Creek-77	38.59	2.48	1.88589	0.046	0.178408	0.0027	0.21057	5.58971	0.0843613	0.0767	0.002	1076.79	17	1058.27	15.7055	1082	54	1082	54
Upper Mud Creek-78	232	0.787	0.578011	0.017	0.0675365	0.00098	0.39693	14.6757	0.211068	0.0621	0.0018	463.465	11	421.297	6.02091	652	61	421.297	6.02091
Chickasaw Creek
Chickasaw-1	581	1.124	0.39495	0.0079	0.0518216	0.00054	0.28112	19.2382	0.199858	0.0553	0.0011	338.185	5.8	325.696	3.36202	404	42	325.696	3.36202
Chickasaw-2	638	1.523	0.45759	0.023	0.0503068	0.00071	0.17329	19.5389	0.271055	0.066	0.0034	382.814	16	316.405	4.53976	750	100	316.405	4.53976
Chickasaw-3	383.6	1.161	0.3929	0.012	0.0481565	0.00065	0.34833	20.5846	0.275422	0.0592	0.0017	336.691	9	303.193	4.05161	549	63	303.193	4.05161
Chickasaw-4	1050	0.75	0.437278	0.029	0.0531468	0.0012	0.52692	18.6567	0.417688	0.0597	0.0029	368.555	20	333.812	7.45816	580	100	333.812	7.45816
Chickasaw-5	447	0.995	1.86919	0.054	0.1654	0.0026	0.32096	5.96659	0.0925604	0.082	0.0023	1070.9	19	986.714	15.1133	1224	56	1224	56
Chickasaw-6	590	1.241	0.380738	0.0083	0.0514454	0.00058	0.18119	19.4175	0.218682	0.0537	0.0013	327.781	6.2	323.389	3.62529	331	51	323.389	3.62529
Chickasaw-7	437	1.453	0.432125	0.019	0.0547204	0.0014	0.23579	18.1818	0.46281	0.0573	0.0025	364.907	14	343.437	8.66931	500	110	343.437	8.66931
Chickasaw-8	1038	0.811	0.377634	0.012	0.0512166	0.00088	0.64124	19.5084	0.334908	0.0535	0.0013	325.494	8.7	321.987	5.46867	337	56	321.987	5.46867
Chickasaw-9	509	1.339	0.38715	0.01	0.0502529	0.00053	0.091195	19.8177	0.208152	0.0559	0.0016	332.488	7.3	316.074	3.33228	413	60	316.074	3.33228
Chickasaw-10	410.4	1.483	0.374992	0.011	0.050669	0.00091	0.10768	19.7122	0.3536	0.0537	0.0019	323.544	8.4	318.627	5.68071	325	76	318.627	5.68071
Chickasaw-11	665	1.42	0.388222	0.0075	0.0517815	0.00061	0.094746	19.2752	0.226636	0.0544	0.0012	333.273	5.5	325.45	3.79976	363	49	325.45	3.79976
Chickasaw-12	679	1.059	0.388953	0.013	0.0506682	0.00087	0.43101	19.6618	0.336331	0.0557	0.0017	333.807	9.6	318.623	5.41139	426	68	318.623	5.41139
Chickasaw-13	482	0.815	0.419857	0.014	0.0480514	0.00098	0.00038508	20.517	0.412529	0.0634	0.0028	356.166	11	302.547	6.09289	685	94	302.547	6.09289
Chickasaw-14	532	0.93	0.412686	0.0097	0.0486898	0.00055	0.15106	20.3005	0.22666	0.0615	0.0015	351.021	6.9	306.473	3.42284	626	52	306.473	3.42284
Chickasaw-15	691	0.958	0.374268	0.008	0.0506655	0.00051	0.096771	19.7161	0.198249	0.0536	0.0012	323.009	6	318.606	3.1919	339	51	318.606	3.1919
Chickasaw-16	62.5	1.441	3.49469	0.094	0.261955	0.0041	0.23464	3.80084	0.0592301	0.0968	0.0028	1526.95	21	1499.84	23.584	1546	54	1546	54
Chickasaw-17	711	1.088	0.37737	0.0092	0.0496046	0.00063	0.21387	20.0924	0.254335	0.0552	0.0014	325.299	6.7	312.094	3.93095	390	55	312.094	3.93095
Chickasaw-18	866	1.183	0.450768	0.029	0.0484555	0.00087	0.086543	20.2388	0.356361	0.0675	0.0042	378.047	19	305.032	5.54484	810	130	305.032	5.54484
Chickasaw-19	776	1.207	0.394755	0.009	0.0502513	0.0005	0.20742	19.7902	0.195826	0.057	0.0013	338.043	6.6	316.064	3.1244	467	51	316.064	3.1244
Chickasaw-20	455	1.86	0.533554	0.011	0.0662918	0.00085	0.3306	15.0195	0.191748	0.0584	0.0013	434.43	7.7	413.776	5.2272	525	48	413.776	5.2272
Chickasaw-21	617	1.331	0.439918	0.011	0.0509908	0.00051	0.16655	19.3648	0.191248	0.0626	0.0017	370.42	7.9	320.602	3.19551	650	57	320.602	3.19551
Chickasaw-22	1500	0.844	0.404503	0.0093	0.0525054	0.001	0.33291	18.9753	0.360063	0.0559	0.0014	345.119	6.8	329.885	6.18953	434	58	329.885	6.18953
Chickasaw-23	234.9	0.69	0.794768	0.023	0.085434	0.0015	0.11882	11.5607	0.200474	0.0675	0.002	594.235	13	528.476	9.05589	838	63	528.476	9.05589
Chickasaw-24	901	1.067	0.378469	0.0093	0.0515225	0.00078	0.24684	19.3986	0.29352	0.0533	0.0014	326.11	6.9	323.862	4.85883	320	57	323.862	4.85883
Chickasaw-25	738	1.188	0.409063	0.02	0.049801	0.00073	0.496	19.9005	0.289102	0.0596	0.0024	348.412	14	313.3	4.58496	551	85	313.3	4.58496
Chickasaw-26	587	0.652	0.419071	0.015	0.0500125	0.00086	0.2806	19.7863	0.336688	0.0608	0.0022	355.603	11	314.598	5.3467	606	79	314.598	5.3467
Chickasaw-27	785	0.725	0.436415	0.015	0.0522542	0.00088	0.15232	18.9502	0.316016	0.0606	0.0022	367.946	12	328.346	5.46868	585	79	328.346	5.46868
Chickasaw-28	458	1.195	0.468756	0.016	0.0510701	0.00092	0.32694	19.2345	0.340368	0.0666	0.0021	390.567	11	321.088	5.66241	789	67	321.088	5.66241
Chickasaw-29	289	1.274	0.396995	0.012	0.0502718	0.00058	0.073766	19.7746	0.226799	0.0573	0.0018	339.673	8.4	316.19	3.64446	448	67	316.19	3.64446
Chickasaw-30	138	2.61	1.65887	0.046	0.166023	0.003	0.3554	6.02047	0.108738	0.0725	0.002	993.551	17	990.164	17.5039	972	56	972	56
Chickasaw-31	652	1.345	0.600302	0.013	0.07497	0.00078	0.17976	13.3085	0.13815	0.0581	0.0013	477.716	8.3	466.029	4.79852	502	49	466.029	4.79852
Chickasaw-32	3107	0.668	0.392467	0.011	0.0512179	0.00091	0.29676	19.4552	0.344441	0.0556	0.0014	336.375	7.9	321.995	5.6424	423	56	321.995	5.6424
Chickasaw-33	790	0.726	0.403395	0.0084	0.049111	0.0006	0.29952	20.1776	0.24428	0.0596	0.0013	344.318	6.1	309.061	3.72199	565	45	309.061	3.72199
Chickasaw-34	408	0.995	0.378716	0.01	0.0507938	0.00073	0.40137	19.6541	0.281987	0.0541	0.0014	326.292	7.5	319.393	4.54816	348	56	319.393	4.54816
Chickasaw-35	1391	0.922	0.382656	0.0081	0.0515127	0.00049	0.30095	19.3874	0.184176	0.0539	0.0011	329.191	6	323.802	3.06207	343	47	323.802	3.06207
Chickasaw-36	1144	1.073	0.49942	0.016	0.0533692	0.0012	0.33488	18.3823	0.405493	0.0679	0.0022	411.561	11	335.173	7.33844	846	69	335.173	7.33844
Chickasaw-37	617	1.172	0.392063	0.0081	0.052198	0.00052	0.23104	19.1205	0.190108	0.0545	0.0011	336.08	5.9	328.002	3.2428	370	48	328.002	3.2428
Chickasaw-38	297.3	1.284	0.380983	0.0093	0.05063	0.00053	0.05965	19.7044	0.20578	0.0546	0.0015	327.961	7	318.388	3.33007	365	59	318.388	3.33007
Chickasaw-39	625	0.83	0.452466	0.015	0.0482096	0.00079	0.4272	20.3252	0.32636	0.0681	0.002	379.236	10	303.52	4.86679	860	64	303.52	4.86679
Chickasaw-40	1515	0.811	0.384837	0.0067	0.0519026	0.00064	0.25909	19.2456	0.237051	0.0538	0.001	330.793	4.9	326.192	3.97697	355	43	326.192	3.97697
Chickasaw-41	529	1.22	0.400388	0.01	0.0507901	0.0006	0.46291	19.5771	0.229959	0.0572	0.0014	342.138	7.5	319.371	3.7379	472	53	319.371	3.7379
Chickasaw-42	451	1.207	0.387349	0.016	0.0514759	0.00096	0.19726	19.3836	0.360695	0.0546	0.0023	332.634	11	323.577	6.00307	361	90	323.577	6.00307
Chickasaw-43	217	2.115	0.381899	0.015	0.0505665	0.00095	0.21218	19.7239	0.369579	0.0548	0.0021	328.635	11	317.998	5.92899	375	86	317.998	5.92899
Chickasaw-44	869	1.133	0.395084	0.012	0.0511913	0.0011	0.5923	19.4552	0.416358	0.056	0.0016	338.283	9.4	321.831	6.81338	413	64	321.831	6.81338
Chickasaw-45	883	0.812	0.412213	0.014	0.0493564	0.00072	0.0083418	20.0521	0.289504	0.0606	0.0022	350.681	9.7	310.569	4.5029	593	80	310.569	4.5029
Chickasaw-46	834	0.8	0.389734	0.011	0.050953	0.00076	0.21862	19.558	0.290711	0.0555	0.0016	334.379	8	320.37	4.73424	407	64	320.37	4.73424
Chickasaw-47	3031	0.525	0.494469	0.013	0.0493513	0.00076	0.36301	19.7394	0.296131	0.0727	0.0018	408.2	8.8	310.538	4.64768	985	51	310.538	4.64768
Chickasaw-48	356.5	0.897	0.421177	0.012	0.0475278	0.00064	0.022223	20.7168	0.274679	0.0643	0.0021	357.11	8.9	299.326	3.99454	709	70	299.326	3.99454
Chickasaw-49	221.8	1.41	0.375937	0.014	0.0510821	0.00074	0.29366	19.5618	0.283172	0.0534	0.0019	324.242	10	321.161	4.64262	308	77	321.161	4.64262
Chickasaw-50	453	0.979	0.508547	0.016	0.0498647	0.00062	0.21191	19.5046	0.235866	0.074	0.0025	417.726	11	313.691	3.87482	989	69	313.691	3.87482
Chickasaw-51	598	0.991	0.376335	0.0092	0.0508505	0.00057	0.10112	19.6425	0.219922	0.0537	0.0015	324.536	6.9	319.741	3.57726	325	59	319.741	3.57726
Chickasaw-52	557	0.801	0.411479	0.024	0.0483119	0.00057	0.15064	20.4499	0.238373	0.0618	0.0033	350.153	16	304.149	3.72267	640	110	304.149	3.72267
Chickasaw-53	1000	0.707	0.47324	0.026	0.0553839	0.0011	0.16059	17.8571	0.350765	0.062	0.0034	393.664	18	347.491	6.88188	630	110	347.491	6.88188
Chickasaw-54	706	0.931	0.384041	0.0088	0.0502087	0.00056	0.34047	19.8452	0.220546	0.0555	0.0012	330.209	6.7	315.803	3.49006	404	50	315.803	3.49006
Chickasaw-55	350	1.631	0.379341	0.0096	0.0509718	0.00054	0.27464	19.5886	0.207206	0.054	0.0013	326.752	7.1	320.485	3.37974	339	55	320.485	3.37974
Chickasaw-56	294	1.394	0.400206	0.015	0.0518549	0.00088	0.30474	19.2086	0.324694	0.056	0.002	342.006	11	325.9	5.48632	409	77	325.9	5.48632
Chickasaw-57	77	1.41	0.508085	0.048	0.0569805	0.0021	0.21201	17.301	0.628584	0.0647	0.0062	417.415	32	357.236	13.0739	680	200	357.236	13.0739
Chickasaw-58	423.9	1.566	0.382388	0.0099	0.0517647	0.00057	0.15311	19.3013	0.212348	0.0536	0.0015	328.994	7.5	325.347	3.57773	326	60	325.347	3.57773
Chickasaw-59	561	1.179	0.415336	0.015	0.0503114	0.00056	0.04995	19.6928	0.217171	0.0599	0.0023	352.925	11	316.433	3.56044	548	81	316.433	3.56044
Chickasaw-60	373.6	1.208	0.482472	0.023	0.0485546	0.0008	0.033912	20.0763	0.322446	0.0721	0.0034	400.011	16	305.642	5.02241	944	99	305.642	5.02241
Chickasaw-61	453	1.224	0.374379	0.0089	0.0508702	0.00055	0.21783	19.6425	0.212205	0.0534	0.0013	323.09	6.6	319.862	3.44338	319	54	319.862	3.44338
Chickasaw-62	562	0.836	0.539697	0.013	0.0651583	0.001	0.41524	15.2439	0.232377	0.0601	0.0014	438.492	8.4	406.92	6.13017	588	50	406.92	6.13017
Chickasaw-63	781	1.07	0.380713	0.0097	0.0506869	0.00066	0.18679	19.685	0.25575	0.0545	0.0014	327.762	7.1	318.737	4.1172	381	61	318.737	4.1172
Chickasaw-64	678	1.222	0.401028	0.0087	0.0527144	0.00059	0.18288	18.9179	0.211153	0.0552	0.0013	342.602	6.3	331.165	3.679	403	51	331.165	3.679
Chickasaw-65	2700	0.533	0.410875	0.0055	0.0526358	0.0005	0.27281	18.9107	0.178808	0.05664	0.00078	349.718	4	330.683	3.09514	467	32	330.683	3.09514
Chickasaw-66	648	3.29	2.04823	0.087	0.17362	0.0064	0.85019	5.66893	0.205676	0.0856	0.0023	1132.4	29	1032.03	36.3938	1321	49	1321	49
Chickasaw-67	1168	0.642	0.389774	0.0077	0.0510502	0.0005	0.047059	19.5236	0.190586	0.0554	0.0012	334.408	5.6	320.966	3.1238	407	48	320.966	3.1238
Chickasaw-68	881	0.936	0.484553	0.011	0.0536777	0.00059	0.28511	18.3352	0.198345	0.0655	0.0014	401.436	7.4	337.061	3.63958	761	45	337.061	3.63958
Chickasaw-69	788	0.857	0.397245	0.0079	0.0500415	0.00061	0.30897	19.857	0.240524	0.0576	0.0012	339.855	5.9	314.776	3.78625	490	45	314.776	3.78625
Chickasaw-70	516	1.363	0.375863	0.008	0.051072	0.00057	0.17877	19.5656	0.218204	0.0534	0.0012	324.187	5.9	321.1	3.55983	318	51	321.1	3.55983
Chickasaw-71	699	0.935	0.382302	0.0088	0.0508984	0.0006	0.27437	19.604	0.23059	0.0545	0.0012	328.931	6.5	320.035	3.73881	378	49	320.035	3.73881
Chickasaw-72	890	0.625	0.407245	0.01	0.0498305	0.00064	0.25712	19.8965	0.253358	0.0593	0.0015	347.101	7.4	313.481	3.97766	557	56	313.481	3.97766
Chickasaw-73	665	1.001	0.387977	0.0093	0.0504505	0.00078	0.28028	19.7433	0.304044	0.0558	0.0013	333.093	6.8	317.287	4.84065	420	52	317.287	4.84065
Chickasaw-74	608	1.212	0.381348	0.0095	0.0508647	0.0008	0.25955	19.6194	0.307936	0.0544	0.0014	328.229	7	319.828	4.97584	365	57	319.828	4.97584
Chickasaw-75	936	0.889	0.389884	0.0095	0.0516237	0.00066	0.14549	19.3237	0.246447	0.0548	0.0013	334.489	6.9	324.482	4.10942	389	56	324.482	4.10942
Chickasaw-76	566	0.843	0.41068	0.017	0.0514659	0.00098	0.25884	19.305	0.36523	0.0579	0.0023	349.578	12	323.515	6.10036	505	86	323.515	6.10036
Chickasaw-77	452	1.519	0.396074	0.012	0.0518753	0.00086	0.17782	19.216	0.317559	0.0554	0.0017	339.003	8.6	326.024	5.35072	419	71	326.024	5.35072
Chickasaw-78	1609	0.785	0.377431	0.011	0.0513813	0.00083	0.41406	19.4515	0.314038	0.0533	0.0015	325.345	8.4	322.996	5.171	319	61	322.996	5.171
Chickasaw-79	901	0.589	0.66286	0.028	0.0520528	0.00079	0.099316	18.2382	0.262779	0.0924	0.004	516.677	17	327.112	4.96121	1412	81	327.112	4.96121
Chickasaw-80	515	0.779	0.4158	0.011	0.0497858	0.00088	0.45279	19.8807	0.347814	0.0606	0.0015	353.259	7.7	313.207	5.43101	619	50	313.207	5.43101
Chickasaw-81	868	0.994	0.384861	0.012	0.0497777	0.00077	0.19436	20	0.308	0.0561	0.0018	330.81	8.5	313.157	4.80416	418	66	313.157	4.80416
Barnett
Barnett-1	658	0.953	0.285787	0.01	0.037229	0.00082	0.52614	26.6951	0.584357	0.0557	0.0017	255.393	7.8	235.634	5.12373	412	68	235.634	5.12373
Barnett-2	2460	0.825	0.288566	0.01	0.0389911	0.0007	0.43621	25.5624	0.457404	0.0537	0.0017	257.587	7.9	246.576	4.39123	329	71	246.576	4.39123
Barnett-3	545	0.1545	0.328403	0.011	0.0401833	0.00058	0.49534	24.6305	0.351865	0.0593	0.0019	288.521	8.4	253.969	3.636	546	65	253.969	3.636
Barnett-4	96.9	0.674	0.357759	0.012	0.0430494	0.00082	0.44728	22.9727	0.432749	0.0603	0.0017	310.73	8.6	271.707	5.08539	579	63	271.707	5.08539
Barnett-5	102.922	0.26039	0.382642	0.0265357	0.0433949	0.00194212	0.729646	22.6833	0.99928	0.0639517	0.00300871	328.98	19.3111	273.842	11.951	740.033	48.9959	273.842	11.951
Barnett-6	470	0.1038	0.318	0.012	0.0435	0.00094	0.38476	22.9885	0.496763	0.0544	0.0022	279.9	9.3	274.4	5.8	353	89	274.4	5.8
Barnett-7	307.6	0.989	0.32936	0.008	0.0436098	0.0005	0.3955	22.8415	0.260867	0.0548	0.0012	289.253	6.1	275.169	3.12898	391	50	275.169	3.12898
Barnett-8	169.2	1.54	0.356897	0.014	0.0446487	0.0013	0.73986	22.2222	0.641975	0.058	0.0016	310.084	11	281.584	8.04445	487	60	281.584	8.04445
Barnett-9	297	0.254	0.355	0.012	0.0465	0.00069	0.022304	21.5054	0.319112	0.0552	0.0017	306.9	9	292.9	4.3	382	68	292.9	4.3
Barnett-10	342	1.568	0.353161	0.0075	0.0465912	0.00065	0.25974	21.3858	0.297279	0.055	0.0012	307.283	5.6	293.559	4.04784	395	52	293.559	4.04784
Barnett-11	916	1.05	0.35968	0.012	0.0466873	0.00096	0.40257	21.3174	0.436255	0.0559	0.0017	312.166	8.9	294.151	5.96846	426	69	294.151	5.96846
Barnett-12	258	0.648	0.418527	0.013	0.0467201	0.00069	0.17518	21.0526	0.305817	0.065	0.0022	355.214	9.2	294.354	4.29723	727	71	294.354	4.29723
Barnett-13	173	0.543	0.366	0.011	0.04706	0.00092	0.17436	21.2495	0.415417	0.0568	0.0015	315	8.2	296.4	5.7	453	56	296.4	5.7
Barnett-14	97.3	0.363	0.654038	0.044	0.0471268	0.00083	0.0001	19.9005	0.328705	0.1007	0.0068	511.272	25	296.857	5.5529	1520	120	296.857	5.5529
Barnett-15	830	0.48	0.396851	0.018	0.0472054	0.0008	0.3702	20.9468	0.351015	0.061	0.0026	339.568	13	297.341	5.01021	599	90	297.341	5.01021
Barnett-16	291	1.339	0.358336	0.01	0.0477076	0.00071	0.29946	20.903	0.310224	0.0545	0.0016	311.161	7.7	300.432	4.43655	358	63	300.432	4.43655
Barnett-17	609	1.088	0.376077	0.011	0.0478736	0.00053	0.24924	20.7641	0.228509	0.057	0.0016	324.345	7.9	301.454	3.32667	453	61	301.454	3.32667
Barnett-18	480.2	1.543	0.406532	0.014	0.0478859	0.00062	0.19236	20.6356	0.264013	0.0616	0.0021	346.585	9.9	301.529	3.88765	599	73	301.529	3.88765
Barnett-19	688	0.923	0.3476	0.0063	0.04801	0.00067	0.32903	20.829	0.290677	0.05266	0.00091	303.1	4.8	302.3	4.1	301	39	302.3	4.1
Barnett-20	406	1.4	0.368585	0.013	0.048015	0.00093	0.48621	20.7383	0.399971	0.0557	0.0017	318.798	9.7	302.323	5.7832	411	68	302.323	5.7832
Barnett-21	232.4	0.678	0.443	0.012	0.04808	0.00073	0.17154	20.7987	0.315787	0.0674	0.0019	371.9	8.6	302.7	4.5	813	57	302.7	4.5
Barnett-22	124.4	0.379	0.398172	0.042	0.0482323	0.0025	0.56927	20.5339	1.0541	0.0599	0.0046	340.529	30	303.66	15.4646	570	160	303.66	15.4646
Barnett-23	860	1.145	0.359304	0.008	0.048369	0.00051	0.10951	20.6356	0.217172	0.0539	0.0013	311.885	6	304.5	3.19743	340	52	304.5	3.19743
Barnett-24	892	1.455	0.362611	0.0087	0.0484546	0.0006	0.28833	20.5888	0.25434	0.0543	0.0013	314.354	6.5	305.027	3.74689	352	51	305.027	3.74689
Barnett-25	383	0.585	0.469	0.02	0.0485	0.00072	0.044807	20.6186	0.30609	0.0712	0.0031	388	14	305.3	4.4	895	89	305.3	4.4
Barnett-26	200	1.767	0.39103	0.011	0.0485008	0.00062	0.32738	20.4583	0.259495	0.0585	0.0015	335.326	7.9	305.311	3.86045	516	58	305.311	3.86045
Barnett-27	958	0.684	0.377168	0.013	0.0485233	0.00094	0.40643	20.5044	0.395205	0.0564	0.0018	325.151	9.7	305.449	5.84309	425	71	305.449	5.84309
Barnett-28	253	1.707	0.367349	0.008	0.0488181	0.00055	0.27766	20.429	0.229539	0.0546	0.0012	317.881	5.9	307.261	3.43358	369	48	307.261	3.43358
Barnett-29	356	1.383	0.3556	0.0083	0.04898	0.00078	0.24857	20.4165	0.32513	0.0534	0.0011	308.1	6.2	308.2	4.8	331	47	308.2	4.8
Barnett-30	210	0.2402	0.385	0.018	0.04912	0.00085	0.13258	20.3583	0.352291	0.0577	0.0026	329	13	309.1	5.2	460	97	309.1	5.2
Barnett-31	272	2.067	0.368307	0.018	0.0493066	0.00077	0.34147	20.2388	0.315399	0.0542	0.0024	318.592	13	310.263	4.85594	336	98	310.263	4.85594
Barnett-32	785	0.381	0.411963	0.01	0.0493264	0.00052	0.22991	20.0642	0.209338	0.0606	0.0015	350.501	7.5	310.385	3.24555	585	55	310.385	3.24555
Barnett-33	119.2	1.035	0.379538	0.0097	0.0494417	0.00068	0.33767	20.145	0.27596	0.0557	0.0014	326.897	7.1	311.093	4.23447	402	57	311.093	4.23447
Barnett-34*	526	0.816	0.375	0.013	0.04957	0.00079	0.03441	20.1735	0.321506	0.0554	0.0019	321.8	9.9	311.8	4.8	389	74	311.8	4.8
Barnett-35	263.307	0.409646	0.376398	0.0228252	0.0495744	0.00214067	0.786179	20.108	0.865544	0.0550667	0.00207253	324.384	16.7557	311.908	13.2505	414.932	41.5134	311.908	13.2505
Barnett-36	372	1.653	0.376912	0.0082	0.0498152	0.00051	0.16509	20.016	0.204327	0.0549	0.0013	324.961	6	313.387	3.19332	375	50	313.387	3.19332
Barnett-37	310	0.39	0.433	0.013	0.04989	0.00068	0.077898	20.0441	0.273201	0.0639	0.0019	363.3	9.5	313.8	4.2	697	61	313.8	4.2
Barnett-38	699	1.025	0.372181	0.012	0.0499173	0.00081	0.32252	19.996	0.32387	0.0541	0.0016	321.465	8.7	314.014	5.05003	350	67	314.014	5.05003
Barnett-39	229	1.972	0.38066	0.012	0.0500372	0.00064	0.20331	19.9203	0.253964	0.0552	0.0017	327.724	8.5	314.75	4.01034	373	65	314.75	4.01034
Barnett-40	216.4	1.879	0.381914	0.012	0.0501111	0.00066	0.22376	19.8886	0.261068	0.0553	0.0017	328.645	8.4	315.204	4.13162	380	64	315.204	4.13162
Barnett-41	369.09	0.457211	0.362802	0.018087	0.0502045	0.00174485	0.788082	19.9258	0.692773	0.0524114	0.00162697	314.305	13.4338	315.777	10.832	303.402	34.9955	315.777	10.832
Barnett-42	914	0.926	0.392596	0.013	0.0502408	0.0013	0.41821	19.802	0.509754	0.0567	0.002	336.469	9.5	316	8.0522	456	79	316	8.0522
Barnett-43	655	1.097	0.376098	0.012	0.0502568	0.00067	0.086905	19.857	0.264182	0.0543	0.0019	324.361	9.2	316.098	4.21135	342	76	316.098	4.21135
Barnett-44	190.7	2.003	0.379771	0.012	0.0502846	0.00056	0.14345	19.8334	0.220284	0.0548	0.0018	327.069	8.8	316.269	3.53421	362	68	316.269	3.53421
Barnett-45	272	3.82	0.378217	0.011	0.0503546	0.00064	0.15871	19.8137	0.251254	0.0545	0.0016	325.924	8.2	316.698	4.00713	350	65	316.698	4.00713
Barnett-46*	705	0.321	0.362	0.015	0.0504	0.0016	0.36784	19.8413	0.629882	0.0534	0.0023	312	11	317	9.6	307	95	317	9.6
Barnett-47	227.8	1.278	0.366947	0.012	0.0505227	0.00071	0.25168	19.7941	0.278184	0.0527	0.0017	317.582	8.7	317.73	4.4504	275	69	317.73	4.4504
Barnett-48	230	1.489	0.378931	0.0093	0.0505424	0.00057	0.12435	19.7433	0.222186	0.0544	0.0014	326.45	6.9	317.851	3.56764	350	56	317.851	3.56764
Barnett-49	310	1.285	0.37472	0.0065	0.050585	0.00049	0.2571	19.7433	0.191002	0.05375	0.00097	323.343	4.9	318.112	3.0559	343	40	318.112	3.0559
Barnett-50	563	1.027	0.378736	0.011	0.0506094	0.00056	0.21197	19.72	0.217771	0.0543	0.0015	326.307	7.9	318.262	3.51376	358	62	318.262	3.51376
Barnett-51	254.5	1.204	0.379687	0.011	0.0506431	0.0006	0.07617	19.7044	0.232959	0.0544	0.0018	327.007	8.5	318.469	3.77848	338	70	318.469	3.77848
Barnett-52	628	1.929	0.379264	0.0088	0.0506799	0.00048	0.12877	19.6928	0.186147	0.0543	0.0013	326.695	6.4	318.694	3.0128	353	52	318.694	3.0128
Barnett-53	270	1.31	0.379989	0.014	0.0506834	0.00076	1e-05	19.6889	0.294617	0.0544	0.0022	327.229	10	318.716	4.77999	330	86	318.716	4.77999
Barnett-54	314.478	0.500188	0.365112	0.0173818	0.0506911	0.00151845	0.74371	19.7407	0.591732	0.0522388	0.00168837	316.024	12.891	318.763	9.43355	295.878	36.4688	318.763	9.43355
Barnett-55	375.2	2.268	0.378115	0.011	0.0507132	0.00054	0.030712	19.685	0.20925	0.0541	0.0017	325.849	7.9	318.899	3.40825	327	65	318.899	3.40825
Barnett-56*	99.2	1.751	0.378191	0.011	0.0507233	0.00062	0.11249	19.6812	0.240156	0.0541	0.0016	325.904	8.1	318.961	3.88703	340	67	318.961	3.88703
Barnett-57	122	1.279	0.377	0.01	0.05074	0.00075	0.34504	19.7083	0.291313	0.0543	0.0015	323.5	7.3	319	4.6	348	60	319	4.6
Barnett-58	387	1.323	0.3722	0.0084	0.05079	0.00073	0.16762	19.6889	0.282987	0.0536	0.0011	321.1	6.4	319.3	4.5	334	47	319.3	4.5
Barnett-59	277	1.785	0.375162	0.011	0.0507865	0.00058	0.21921	19.6696	0.224397	0.0536	0.0015	323.669	8	319.348	3.63867	317	62	319.348	3.63867
Barnett-60	308	1.099	0.412	0.013	0.05081	0.00085	0.23661	19.6812	0.329246	0.0604	0.0019	348.8	9.4	319.4	5.2	573	68	319.4	5.2
Barnett-61	623	0.67	0.37	0.013	0.05082	0.00069	0.15308	19.6773	0.267165	0.0531	0.0018	317.7	9.6	319.5	4.2	305	73	319.5	4.2
Barnett-62	289.3	1.124	0.377864	0.0098	0.0508675	0.00057	0.17577	19.6309	0.219663	0.0539	0.0015	325.663	7.3	319.845	3.5764	334	60	319.845	3.5764
Barnett-63	310.594	0.495974	0.367174	0.0185385	0.0508724	0.00185057	0.804466	19.6683	0.715879	0.0523466	0.00158693	317.557	13.7249	319.875	11.4823	300.581	34.2021	319.875	11.4823
Barnett-64	188.6	2.99	0.383681	0.012	0.0508952	0.00081	0.2775	19.6002	0.311175	0.0547	0.0017	329.944	9.1	320.015	5.05046	366	69	320.015	5.05046
Barnett-65	641	1.047	0.383	0.013	0.0509	0.0011	0.3174	19.6464	0.424578	0.0561	0.0019	328.8	9.6	320.3	6.8	428	74	320.3	6.8
Barnett-66	718	1.076	0.380647	0.01	0.0509585	0.00054	0.17007	19.5886	0.207206	0.0542	0.0015	327.713	7.4	320.404	3.39254	343	58	320.404	3.39254
Barnett-67	728	1.247	0.3699	0.0097	0.05099	0.00072	0.31393	19.6117	0.276925	0.0527	0.0013	318.8	7.1	320.5	4.4	296	56	320.5	4.4
Barnett-68	425	1.125	0.380948	0.012	0.0509988	0.00062	0.10841	19.5733	0.237531	0.0542	0.0017	327.935	8.6	320.651	3.89354	338	69	320.651	3.89354
Barnett-69	521	2.105	0.379436	0.0091	0.0510792	0.00055	0.26553	19.5503	0.210219	0.0539	0.0013	326.822	6.6	321.144	3.4412	338	51	321.144	3.4412
Barnett-70	189	1.807	0.377844	0.012	0.0511495	0.00061	0.11246	19.5312	0.232697	0.0536	0.0017	325.649	8.5	321.575	3.83554	311	68	321.575	3.83554
Barnett-71*	588	1.212	0.3755	0.0084	0.05117	0.00093	0.41395	19.5427	0.355183	0.0532	0.0012	323	6.2	321.6	5.7	328	49	321.6	5.7
Barnett-72	150.7	2.085	0.381066	0.012	0.0512036	0.00056	0.21355	19.5008	0.212957	0.054	0.0017	328.022	8.7	321.907	3.53019	329	67	321.907	3.53019
Barnett-73	181.7	1.609	0.382754	0.01	0.0512407	0.00065	0.29536	19.4818	0.246701	0.0542	0.0015	329.263	7.7	322.134	4.06306	347	58	322.134	4.06306
Barnett-74	374	0.6638	0.3769	0.0083	0.05127	0.00044	0.20314	19.5046	0.167389	0.0536	0.0012	324.9	6.3	322.3	2.7	332	50	322.3	2.7
Barnett-75	826	1.115	0.385101	0.0086	0.0512711	0.00059	0.26167	19.4628	0.223493	0.0545	0.0012	330.986	6.3	322.321	3.67727	365	50	322.321	3.67727
Barnett-76	180	1.616	0.384165	0.015	0.0513348	0.00081	0.066049	19.4439	0.306233	0.0543	0.0023	330.299	11	322.711	5.09207	337	90	322.711	5.09207
Barnett-77	404.777	0.556933	0.378895	0.017977	0.0513589	0.00182053	0.829831	19.4547	0.689045	0.0535059	0.00143134	326.225	13.1928	322.859	11.2738	350.312	29.953	322.859	11.2738
Barnett-78	523.638	0.428319	0.377798	0.0179576	0.0513603	0.00193673	0.865235	19.4581	0.73328	0.0533495	0.00128399	325.417	13.1898	322.868	11.9911	343.691	27.0048	322.868	11.9911
Barnett-79	370	0.991	0.39598	0.016	0.051399	0.0012	0.43485	19.3798	0.450694	0.0559	0.0022	338.935	12	323.105	7.4534	407	82	323.105	7.4534
Barnett-80	1010	0.988	0.386085	0.0067	0.051402	0.00048	0.21603	19.4137	0.180908	0.0545	0.001	331.707	4.9	323.124	2.99291	367	42	323.124	2.99291
Barnett-81	141	0.681	0.377	0.014	0.0515	0.0011	0.23953	19.4175	0.414742	0.0543	0.0021	324	11	323.4	6.6	348	83	323.4	6.6
Barnett-82	643	1.109	0.378684	0.0089	0.0514553	0.00051	0.16726	19.4213	0.192364	0.0534	0.0013	326.268	6.5	323.45	3.19898	324	54	323.45	3.19898
Barnett-83*	809	1.152	0.3694	0.0079	0.05149	0.00076	0.34486	19.4213	0.28666	0.0523	0.0011	319.3	5.9	323.6	4.6	278	47	323.6	4.6
Barnett-84	473	0.591	0.385	0.0084	0.0515	0.00071	0.2527	19.4175	0.267697	0.0552	0.0011	329.9	6.1	323.7	4.3	393	46	323.7	4.3
Barnett-85	141.1	0.899	0.474147	0.022	0.0515027	0.00092	0.058634	19.0694	0.334551	0.0668	0.0032	394.289	15	323.741	5.74953	740	100	323.741	5.74953
Barnett-86	731	1.402	0.39536	0.013	0.051503	0.0006	0.16846	19.3461	0.224563	0.0557	0.0018	338.484	9.4	323.742	3.77323	385	70	323.742	3.77323
Barnett-87	156	1.14	0.3664	0.0094	0.05155	0.0008	0.23945	19.3986	0.301046	0.0518	0.0013	316.2	7	324	4.9	252	55	324	4.9
Barnett-88	589	1.086	0.390824	0.01	0.0515599	0.00058	0.090235	19.3424	0.216994	0.055	0.0015	335.175	7.3	324.092	3.63249	383	59	324.092	3.63249
Barnett-89	847	0.585	0.3789	0.0081	0.05163	0.00079	0.35682	19.3686	0.296362	0.054	0.0012	325.4	6	324.5	4.8	349	47	324.5	4.8
Barnett-90	308.6	1.041	0.382082	0.0093	0.0516269	0.00056	0.20669	19.3498	0.209673	0.0537	0.0014	328.769	7	324.502	3.50945	335	55	324.502	3.50945
Barnett-91	799	1.49	0.393876	0.0089	0.0516807	0.00069	0.5267	19.2901	0.256755	0.0553	0.001	337.403	6.5	324.832	4.27671	407	42	324.832	4.27671
Barnett-92	333	1.954	0.385404	0.011	0.0516908	0.00061	0.23431	19.3162	0.227601	0.0541	0.0015	331.209	8.2	324.894	3.81925	359	62	324.894	3.81925
Barnett-93	528	1.036	0.381867	0.0098	0.0516941	0.00061	0.32479	19.3274	0.227865	0.0536	0.0013	328.611	7.2	324.914	3.80917	324	54	324.914	3.80917
Barnett-94*	508	1.349	0.375	0.01	0.05172	0.00085	0.16832	19.3349	0.317762	0.0538	0.0013	322.5	7.4	325	5.2	340	52	325	5.2
Barnett-95	531.6	0.926	0.389244	0.012	0.0517278	0.0008	0.52822	19.2901	0.297687	0.0546	0.0015	334.021	8.7	325.12	4.97825	374	61	325.12	4.97825
Barnett-96	520	1.358	0.389244	0.013	0.0517278	0.00062	0.19048	19.2901	0.230708	0.0546	0.0018	334.021	9.2	325.12	3.89947	358	71	325.12	3.89947
Barnett-97*	353	0.997	0.3761	0.0098	0.05178	0.00077	0.32165	19.3125	0.287188	0.0536	0.0014	323.1	7.2	325.4	4.7	326	57	325.4	4.7
Barnett-98	228	1.496	0.38394	0.0095	0.0517815	0.00059	0.20556	19.2901	0.219544	0.0538	0.0013	330.134	6.8	325.45	3.68582	339	54	325.45	3.68582
Barnett-99	81.4	2.27	0.381948	0.014	0.0518017	0.00072	0.16334	19.2901	0.267918	0.0535	0.0019	328.67	9.9	325.574	4.52016	314	78	325.574	4.52016
Barnett-100	305	1.3	0.391329	0.011	0.051815	0.00067	0.24794	19.253	0.248354	0.0548	0.0015	335.544	7.8	325.655	4.18187	361	60	325.655	4.18187
Barnett-101	518	0.961	0.386381	0.011	0.0518219	0.00076	0.055649	19.2678	0.282149	0.0541	0.0016	331.925	7.8	325.697	4.74168	344	67	325.697	4.74168
Barnett-102*	706	0.88	0.377	0.013	0.0518	0.0012	0.24071	19.305	0.447221	0.0533	0.0017	323.8	9.7	325.7	7.3	314	70	325.7	7.3
Barnett-103	218	1.207	0.3789	0.0089	0.05183	0.00091	0.38177	19.2938	0.33875	0.0534	0.0013	325.4	6.5	325.7	5.6	332	55	325.7	5.6
Barnett-104	346.034	0.797966	0.381134	0.0225994	0.0518343	0.00216088	0.78043	19.2824	0.803434	0.0533285	0.00199175	327.872	16.5459	325.773	13.388	342.798	41.7219	325.773	13.388
Barnett-105	722	1.229	0.380989	0.0085	0.0518656	0.00047	0.17598	19.2715	0.174554	0.0533	0.0012	327.965	6.3	325.965	2.94855	318	50	325.965	2.94855
Barnett-106	104	1.306	0.377513	0.013	0.051879	0.00097	0.097145	19.279	0.360528	0.0528	0.002	325.405	9.8	326.048	6.05915	274	82	326.048	6.05915
Barnett-107*	478	1.248	0.3816	0.009	0.05189	0.00075	0.23593	19.2715	0.278544	0.0535	0.0012	327.4	6.6	326.1	4.6	326	50	326.1	4.6
Barnett-108	521	0.836	0.37	0.0094	0.05192	0.00086	0.1534	19.2604	0.319028	0.0529	0.0012	319.5	7.1	326.2	5.3	299	52	326.2	5.3
Barnett-109	235	0.676	0.3845	0.0086	0.05193	0.00098	0.35131	19.2567	0.363404	0.0539	0.0012	329.6	6.3	326.3	6	343	48	326.3	6
Barnett-110	569	0.95	0.3749	0.007	0.05194	0.00075	0.34442	19.253	0.278008	0.0527	0.001	323.5	5	326.4	4.6	299	43	326.4	4.6
Barnett-111	728	1.016	0.387283	0.0078	0.0519428	0.00057	0.17649	19.2234	0.210637	0.0541	0.0012	332.586	5.7	326.439	3.55618	349	47	326.439	3.55618
Barnett-112	656	0.96	0.383212	0.0093	0.0519732	0.00072	0.40458	19.2271	0.26617	0.0535	0.0012	329.6	6.8	326.625	4.479	325	50	326.625	4.479
Barnett-113	464.896	0.709964	0.376717	0.0172919	0.0519839	0.00175584	0.824173	19.2464	0.650403	0.0525588	0.00138395	324.62	12.7162	326.69	10.8829	309.797	29.6995	326.69	10.8829
Barnett-114	436	1.181	0.3756	0.0076	0.052	0.00078	0.37076	19.2308	0.288461	0.0523	0.001	323.8	5.7	326.7	4.8	277	43	326.7	4.8
Barnett-115	813	1.522	0.3837	0.0098	0.052	0.00079	0.28797	19.2308	0.29216	0.0539	0.0014	328.6	7.1	326.7	4.8	331	55	326.7	4.8
Barnett-116	441	1.305	0.368	0.01	0.05206	0.00075	0.21659	19.2086	0.276728	0.0518	0.0014	318.2	7.6	327.1	4.6	254	57	327.1	4.6
Barnett-117	446	0.0868	0.517	0.028	0.0521	0.0014	0.24903	19.1939	0.515766	0.0723	0.0039	421	19	327.2	8.9	960	110	327.2	8.9
Barnett-118	332.471	0.689286	0.379	0.0202909	0.0522033	0.00194652	0.782044	19.1639	0.714871	0.0526551	0.00177466	326.302	14.8887	328.035	12.0676	313.962	37.8896	328.035	12.0676
Barnett-119	161	1.194	0.3774	0.009	0.05228	0.00091	0.36212	19.1278	0.332943	0.0531	0.0012	324.2	6.6	328.4	5.6	310	52	328.4	5.6
Barnett-120	686	1.254	0.389019	0.0073	0.0522722	0.00051	0.25162	19.1059	0.186167	0.054	0.001	333.856	5.3	328.457	3.1779	352	43	328.457	3.1779
Barnett-121	64.6	1.372	0.3716	0.009	0.05229	0.00081	0.25187	19.1241	0.296243	0.0523	0.0011	319.9	6.6	328.5	5	281	47	328.5	5
Barnett-122	367	1.207	0.3767	0.0085	0.05229	0.00078	0.29042	19.1241	0.285271	0.0528	0.0012	323.7	6.3	328.5	4.8	293	49	328.5	4.8
Barnett-123	378.6	1.8	0.376131	0.0079	0.0522832	0.00052	0.23113	19.1461	0.190618	0.0522	0.0011	324.385	5.8	328.524	3.25196	279	47	328.524	3.25196
Barnett-124	479	1.61	0.386188	0.0078	0.0523768	0.00062	0.32935	19.0803	0.225716	0.0535	0.0011	331.783	5.9	329.097	3.85962	331	46	329.097	3.85962
Barnett-125	406	1.117	0.390145	0.012	0.0524235	0.00065	0.2187	19.0512	0.235918	0.054	0.0017	334.679	8.8	329.383	4.07719	332	68	329.383	4.07719
Barnett-126	352	0.984	0.382228	0.0077	0.0524277	0.0005	0.25003	19.0767	0.18196	0.0529	0.001	328.876	5.6	329.409	3.12081	308	44	329.409	3.12081
Barnett-127	615	1.026	0.392	0.011	0.05251	0.00083	0.24572	19.044	0.301019	0.0549	0.0015	334.2	8.1	329.8	5.1	376	60	329.8	5.1
Barnett-128	808	1.298	0.3872	0.0089	0.0525	0.00083	0.22511	19.0476	0.301134	0.054	0.0011	331.4	6.5	329.8	5.1	346	46	329.8	5.1
Barnett-129*	328.2	1.176	0.3837	0.0097	0.05255	0.00077	0.12884	19.0295	0.278834	0.0532	0.0012	328.8	7.1	330.1	4.7	314	49	330.1	4.7
Barnett-130	536.753	4.10318	0.38729	0.0170293	0.0525726	0.00166514	0.816964	19.0117	0.601855	0.0534289	0.00137343	332.388	12.4251	330.296	10.3076	347.053	28.8095	330.296	10.3076
Barnett-131	1037	1.64	0.393593	0.017	0.0525946	0.00086	0.13094	18.9825	0.309889	0.0543	0.0022	337.196	12	330.431	5.38895	346	89	330.431	5.38895
Barnett-132*	684	0.856	0.383	0.011	0.05263	0.00086	0.16384	19.0006	0.310479	0.0538	0.0013	328	7.7	330.5	5.2	332	53	330.5	5.2
Barnett-133*	40	1.454	0.3858	0.0092	0.05264	0.00081	0.23999	18.997	0.292316	0.054	0.0013	330.4	6.7	330.6	5	344	51	330.6	5
Barnett-134	494	1.185	0.443346	0.015	0.0526497	0.00056	0.17485	18.797	0.197863	0.0611	0.0021	372.836	11	330.769	3.54044	587	71	330.769	3.54044
Barnett-135	494	1.321	0.383848	0.01	0.0526499	0.00071	0.14325	18.997	0.256228	0.0529	0.0015	330.066	7.5	330.77	4.43594	305	62	330.77	4.43594
Barnett-136	1004	1.546	0.377	0.0088	0.05267	0.00069	0.17003	18.9861	0.248727	0.0526	0.0012	324	6.5	330.8	4.2	294	50	330.8	4.2
Barnett-137*	649	1.078	0.384	0.011	0.05269	0.00084	0.25065	18.9789	0.302568	0.0533	0.0014	328.5	7.8	331	5.1	314	59	331	5.1
Barnett-138	806	0.975	0.3984	0.0078	0.05272	0.00073	0.35973	18.9681	0.262647	0.0561	0.0012	339.7	5.7	331.1	4.4	432	45	331.1	4.4
Barnett-139	423	1.398	0.3913	0.0096	0.05274	0.00082	0.2969	18.9609	0.294804	0.054	0.0013	335.1	6.8	331.2	5	343	55	331.2	5
Barnett-140	945	1.061	0.388042	0.0095	0.0527268	0.00057	0.068055	18.9574	0.204847	0.0534	0.0014	333.141	6.9	331.241	3.57155	314	57	331.241	3.57155
Barnett-141	108.3	0.801	0.465836	0.024	0.0527313	0.00067	0.19464	18.6951	0.234169	0.0641	0.0032	388.545	16	331.269	4.30494	630	100	331.269	4.30494
Barnett-142	213.775	0.384586	0.414121	0.0253088	0.0527968	0.00219146	0.760904	18.8476	0.778477	0.0568877	0.00226323	351.838	18.0671	331.67	13.5168	487.181	43.3088	331.67	13.5168
Barnett-143	331	1.13	0.398185	0.0094	0.0528192	0.00051	0.075003	18.8929	0.18204	0.0547	0.0014	340.539	6.8	331.807	3.20136	367	54	331.807	3.20136
Barnett-144	771	0.981	0.393	0.01	0.0529	0.0013	0.5402	18.9036	0.46455	0.0543	0.0015	335.9	7.4	332.2	7.9	369	64	332.2	7.9
Barnett-145*	286.114	0.51618	0.380143	0.0216539	0.0528976	0.00197078	0.746338	18.9278	0.706055	0.0521206	0.00199798	327.143	15.8753	332.287	12.2276	290.706	43.204	332.3	12.2
Barnett-146	523	0.552	0.448	0.012	0.0529	0.001	0.33618	18.9036	0.357346	0.0618	0.0015	374.7	8.1	332.5	6.3	657	58	332.5	6.3
Barnett-147	279.483	0.461313	0.388231	0.020606	0.0529348	0.00200798	0.796397	18.8886	0.716407	0.0531922	0.00172325	333.076	15.0166	332.514	12.433	337.003	36.2886	332.514	12.433
Barnett-148	474	1.37	0.405883	0.016	0.0529688	0.00071	0.24283	18.8182	0.251429	0.0556	0.0021	346.117	11	332.723	4.46425	380	81	332.723	4.46425
Barnett-149	830	1.43	0.384456	0.008	0.0530341	0.00057	0.29668	18.8679	0.202919	0.0526	0.001	330.513	5.9	333.123	3.55112	304	44	333.123	3.55112
Barnett-150	864	1.033	0.4065	0.0098	0.05298	0.00082	0.31998	18.8751	0.292139	0.0562	0.0013	345.3	7	333.3	5.1	437	48	333.3	5.1
Barnett-151*	736	1.314	0.3912	0.0097	0.05312	0.00082	0.28787	18.8253	0.290601	0.0538	0.0013	334.2	7.1	333.6	5	329	55	333.6	5
Barnett-152*	515	1.118	0.393	0.011	0.05306	0.00087	0.23354	18.8466	0.309019	0.0541	0.0015	335.3	8.3	333.9	5.5	339	60	333.9	5.5
Barnett-153	315	0.974	0.3816	0.0089	0.05323	0.00071	0.27243	18.7864	0.250579	0.0525	0.0012	327.4	6.5	334.2	4.3	279	50	334.2	4.3
Barnett-154	309	0.555	0.414	0.012	0.05327	0.0008	0.21654	18.7723	0.281919	0.0568	0.0015	351.4	8.5	334.5	4.9	450	60	334.5	4.9
Barnett-155	304.185	4.64041	0.38203	0.0197324	0.0533434	0.00197177	0.798994	18.7754	0.695084	0.0519415	0.00163175	328.53	14.4532	335.016	12.2243	282.837	35.5411	335.016	12.2243
Barnett-156	362	1.114	0.388	0.011	0.05341	0.0009	0.26338	18.7231	0.315499	0.0533	0.0016	331.5	8.3	335.3	5.5	303	64	335.3	5.5
Barnett-157	318.4	2.1	0.434991	0.017	0.0534961	0.001	0.4405	18.5529	0.344209	0.059	0.0021	366.938	12	335.95	6.1993	529	77	335.95	6.1993
Barnett-158	308.148	4.58468	0.376263	0.0187344	0.0535783	0.00198379	0.822937	18.7181	0.695057	0.0509333	0.0014594	324.285	13.7869	336.453	12.309	237.814	32.711	336.453	12.309
Barnett-159	475	0.948	0.39588	0.011	0.0535911	0.00064	0.17513	18.6498	0.222601	0.0536	0.0015	338.862	7.9	336.532	4.00406	319	61	336.532	4.00406
Barnett-160	424	1.056	0.40556	0.011	0.0536015	0.00071	0.17636	18.615	0.246029	0.0549	0.0016	345.883	7.8	336.595	4.43068	375	64	336.595	4.43068
Barnett-161	150.9	2.027	0.404492	0.011	0.0536557	0.00063	0.18959	18.6012	0.217983	0.0547	0.0016	345.111	8.2	336.927	3.94497	365	62	336.927	3.94497
Barnett-162*	620.825	4.12821	0.390084	0.016156	0.0537237	0.00152347	0.797894	18.6267	0.52857	0.0526612	0.00133907	334.431	11.7701	337.342	9.43652	314.229	28.6669	337.342	9.43652
Barnett-163*	484.932	3.73568	0.400252	0.0180909	0.053807	0.0018045	0.830365	18.5673	0.622094	0.0539502	0.00137489	341.831	13.0737	337.852	11.1535	368.973	28.4536	337.852	11.1535
Barnett-164*	560	1.129	0.3995	0.0099	0.05391	0.00069	0.30903	18.5494	0.237416	0.0547	0.0013	340.2	7.1	338.4	4.2	374	55	338.4	4.2
Barnett-165	831	0.993	0.391	0.011	0.05392	0.00073	0.080308	18.546	0.251086	0.0534	0.0014	334.1	7.9	338.5	4.5	310	56	338.5	4.5
Barnett-166	446.649	0.548004	0.386155	0.0186653	0.0540369	0.00184149	0.796426	18.5395	0.632946	0.0518287	0.00153546	331.557	13.6347	339.258	11.4146	277.858	33.5673	339.258	11.4146
Barnett-167*	267.827	0.366127	0.405593	0.0202049	0.0540407	0.00174996	0.754159	18.4763	0.597391	0.0544338	0.00180076	345.697	14.5382	339.282	10.8208	389.039	36.7107	339.282	10.8208
Barnett-168	19.65	1.341	0.392	0.012	0.05407	0.0008	0.27077	18.4945	0.273639	0.0536	0.0017	336.9	9.1	339.4	4.9	319	70	339.4	4.9
Barnett-169	952	1.036	0.39	0.011	0.05414	0.00093	0.27482	18.4706	0.317283	0.0526	0.0014	333.2	8.1	339.8	5.7	287	60	339.8	5.7
Barnett-170*	990	1.31	0.401	0.011	0.05416	0.0007	0.12268	18.4638	0.238639	0.0545	0.0014	341.4	7.8	339.9	4.3	370	54	339.9	4.3
Barnett-171	758	0.624	0.389	0.011	0.05421	0.00089	0.22067	18.4468	0.302853	0.0522	0.0013	332.9	8.1	340.3	5.5	295	62	340.3	5.5
Barnett-172	288.132	0.511524	0.402511	0.0204939	0.0544901	0.0020997	0.831609	18.3457	0.706689	0.0535746	0.00152852	343.468	14.7828	342.029	12.9783	353.21	31.9097	342.029	12.9783
Barnett-173	370.473	0.45381	0.397885	0.0184963	0.0549598	0.00196138	0.847135	18.2155	0.650796	0.0525063	0.00131331	340.113	13.3962	344.9	12.1346	307.521	28.236	344.9	12.1346
Barnett-174	573	1.18	0.423178	0.012	0.0551267	0.00067	0.30033	18.0864	0.21917	0.0557	0.0015	358.54	8.6	345.92	4.17565	409	60	345.92	4.17565
Barnett-175	361	0.916	0.426385	0.015	0.0551484	0.00096	0.30698	18.0701	0.313468	0.0561	0.0019	360.826	11	346.052	5.96378	433	76	346.052	5.96378
Barnett-176	852	0.997	0.4081	0.0088	0.05531	0.00077	0.27226	18.0799	0.2517	0.0542	0.0012	346.6	6.3	346.9	4.7	364	49	346.9	4.7
Barnett-177	532	1.623	0.420663	0.021	0.0555976	0.0011	0.20807	17.9533	0.354554	0.0549	0.0027	356.743	15	348.797	6.87931	370	110	348.797	6.87931
Barnett-178	499	1.03	0.416014	0.011	0.0560033	0.00069	0.21501	17.8476	0.21979	0.0539	0.0014	353.412	7.8	351.273	4.29962	331	58	351.273	4.29962
Barnett-179	303.6	2.607	0.450455	0.012	0.0571413	0.0011	0.50154	17.4216	0.333863	0.0572	0.0013	377.828	8.4	358.217	6.77533	495	49	358.217	6.77533
Barnett-180	471.611	3.72521	0.428752	0.0185817	0.0576889	0.00183639	0.828902	17.3315	0.551614	0.053903	0.00132548	362.29	13.1633	361.555	11.3278	366.998	27.4732	361.555	11.3278
Barnett-181	186.913	0.605854	0.448731	0.0250331	0.0580049	0.00199168	0.720585	17.1892	0.58848	0.0561074	0.00218924	376.39	17.4553	363.481	12.2727	456.623	42.7093	363.481	12.2727
Barnett-182	107.826	0.353582	0.513712	0.0354411	0.058463	0.0025901	0.727395	16.8883	0.73874	0.0637291	0.00300267	420.942	23.5358	366.271	15.81	732.652	49.1254	366.271	15.81
Barnett-183	99.5	1.521	0.448	0.015	0.0591	0.0012	0.42987	16.9205	0.343563	0.0557	0.0021	375	10	370.4	7.2	427	87	370.4	7.2
Barnett-184	28.6	0.2182	0.557	0.027	0.0708	0.0015	0.24942	14.1243	0.299243	0.0587	0.0029	448	17	440.6	9.3	510	110	440.6	9.3
Barnett-185	380	1.032	0.534	0.012	0.0717	0.0011	0.28597	13.947	0.213971	0.0545	0.0012	433.1	8.2	446.3	6.7	372	48	446.3	6.7
Barnett-186	96.2	2.89	0.613588	0.024	0.0721582	0.0013	0.34319	13.7552	0.245966	0.0617	0.0023	486.116	15	449.145	7.97803	602	79	449.145	7.97803
Barnett-187	253.2	0.651	0.732708	0.021	0.0735338	0.0011	0.41534	13.3156	0.195035	0.0723	0.0019	558.482	13	457.41	6.65833	972	56	457.41	6.65833
Barnett-188	1435	0.7	0.577233	0.014	0.073739	0.0011	0.028566	13.5501	0.201967	0.0568	0.0018	462.964	9.3	458.642	6.77625	458	69	458.642	6.77625
Barnett-189	549	1.885	0.596901	0.017	0.0755861	0.00096	0.27051	13.2153	0.167658	0.0573	0.0016	475.555	11	469.722	5.9111	463	63	469.722	5.9111
Barnett-190	341	0.851	0.600112	0.017	0.0755969	0.00095	0.14451	13.2083	0.165736	0.0576	0.0017	477.596	11	469.787	5.85892	465	65	469.787	5.85892
Barnett-191	220	1.94	0.725769	0.019	0.0795489	0.0017	0.49637	12.4224	0.262336	0.0662	0.0016	554.404	11	493.43	10.2433	799	52	493.43	10.2433
Barnett-192	187.662	0.71855	0.659633	0.0339109	0.0824846	0.00287978	0.77239	12.1157	0.422725	0.058	0.00191349	514.389	20.6387	510.936	17.4696	529.764	35.7372	510.936	17.4696
Barnett-193	592	0.97	0.870062	0.056	0.0846263	0.0012	0.090555	11.5607	0.16038	0.0746	0.0047	635.988	30	523.678	7.77928	1010	120	523.678	7.77928
Barnett-194	350	3.97	0.761706	0.019	0.0907536	0.001	0.27024	10.989	0.120758	0.0609	0.0015	575.344	11	559.993	6.10004	603	52	559.993	6.10004
Barnett-195	240	0.868	1.02291	0.036	0.0952783	0.002	0.7251	10.2459	0.209957	0.0779	0.0018	715.811	18	586.678	11.8057	1128	48	586.678	11.8057
Barnett-196	302	1.735	0.830715	0.053	0.0956766	0.003	0.26274	10.4058	0.324844	0.063	0.0042	614.383	29	589.022	18.2047	660	140	589.022	18.2047
Barnett-197	672	3.419	0.799	0.02	0.0969	0.0017	0.21367	10.3199	0.181051	0.0606	0.0014	594	11	596	10	600	49	596	10
Barnett-198	332	11.1	1.17015	0.077	0.102916	0.002	0.23556	9.44287	0.178336	0.0825	0.0049	787.196	34	631.475	12.2954	1200	120	631.475	12.2954
Barnett-199	152.3	2.81	0.897064	0.025	0.104312	0.0013	0.2196	9.56938	0.119045	0.0624	0.0017	650.554	13	639.627	7.8701	653	60	639.627	7.8701
Barnett-200	881	0.857	1.16876	0.038	0.107077	0.0018	0.44182	9.12409	0.149848	0.0792	0.0023	786.546	18	655.749	10.665	1161	59	655.749	10.665
Barnett-201	769	3.99	1.19986	0.05	0.114705	0.0033	0.66426	8.56898	0.242311	0.0759	0.0023	801.01	23	700.015	19.3591	1048	60	700.015	19.3591
Barnett-202	107	5.56	1.08655	0.027	0.121666	0.0015	0.073804	8.21018	0.101111	0.0648	0.0017	747.282	13	740.145	8.99746	739	56	740.145	8.99746
Barnett-203	566	0.409	1.41535	0.022	0.136203	0.0013	0.36693	7.25689	0.0684613	0.0754	0.0012	895.954	9.3	823.154	7.63954	1066	30	823.154	7.63954
Barnett-204	204.4	0.99	1.81947	0.066	0.140297	0.0049	0.61288	6.87758	0.231775	0.0941	0.0029	1053.14	24	846.343	27.8476	1461	58	846.343	27.8476
Barnett-205	939	2.88	1.42569	0.035	0.141903	0.002	0.37554	6.9979	0.0979412	0.0729	0.0017	900.297	15	855.416	11.7559	1002	48	855.416	11.7559
Barnett-206	76	2.674	1.43396	0.043	0.148216	0.0019	0.18702	6.73401	0.086159	0.0702	0.0022	903.755	18	890.954	11.3261	897	64	890.954	11.3261
Barnett-207	450.3	0.796	1.48683	0.043	0.149011	0.0018	0.20522	6.68003	0.080321	0.0724	0.0021	925.588	17	895.416	10.7066	974	58	895.416	10.7066
Barnett-208	343	0.948	1.61269	0.051	0.150599	0.0021	0.41102	6.56599	0.0905356	0.0777	0.0022	975.748	19	904.323	12.3514	1118	55	1118	55
Barnett-209	397	1.82	1.55711	0.022	0.150644	0.0015	0.30736	6.58762	0.065095	0.075	0.0011	953.902	9	904.574	8.7553	1061	31	1061	31
Barnett-210	138.5	14.65	1.52433	0.038	0.150893	0.0016	0.27997	6.59196	0.0695262	0.0733	0.0017	940.791	15	905.965	9.46628	1001	49	1001	49
Barnett-211	140	5.92	1.53211	0.036	0.157018	0.0016	0.21752	6.36537	0.0648287	0.0708	0.0016	943.92	14	940.186	9.47181	932	47	932	47
Barnett-212	182.8	2.523	1.62242	0.035	0.157172	0.002	0.26346	6.32511	0.0800141	0.0749	0.0016	979.526	13	941.044	11.6924	1046	44	1046	44
Barnett-213	175.8	3.62	1.58058	0.07	0.157752	0.0032	0.48146	6.32111	0.127861	0.0727	0.0029	963.183	27	944.273	18.8301	981	79	981	79
Barnett-214	370	0.594	1.54919	0.058	0.158099	0.0028	0.28807	6.32111	0.111878	0.0711	0.0024	950.748	28	946.201	16.4787	965	85	965	85
Barnett-215	118.9	2.87	1.57202	0.042	0.158424	0.0019	0.14319	6.3012	0.0754397	0.072	0.002	959.809	16	948.01	11.2573	940	56	940	56
Barnett-216	181.8	1.266	1.55932	0.043	0.15891	0.002	0.12385	6.28931	0.0791108	0.0712	0.0021	954.781	17	950.715	11.86	916	60	916	60
Barnett-217	183.8	12.58	1.67281	0.051	0.159498	0.002	0.43697	6.22665	0.0775423	0.0761	0.0021	998.862	19	953.988	11.7914	1065	54	1065	54
Barnett-218	30.7	2.076	1.58154	0.039	0.16005	0.0021	0.15158	6.2422	0.0818266	0.0717	0.0019	963.563	16	957.054	12.3713	957	54	957	54
Barnett-219	97.9	2.5	1.75009	0.072	0.160945	0.003	0.44249	6.15006	0.11347	0.0789	0.0028	1027.82	27	962.027	17.5389	1127	72	1127	72
Barnett-220	165.8	2.526	1.65546	0.036	0.164322	0.0016	0.085213	6.07533	0.0590555	0.0731	0.0017	992.246	14	980.751	9.47576	985	49	985	49
Barnett-221	74	11.2	1.64952	0.039	0.165315	0.0019	0.20705	6.04595	0.0694517	0.0724	0.0017	989.97	15	986.248	11.1792	973	48	973	48
Barnett-222	263	6.17	1.7676	0.052	0.166783	0.002	0.25777	5.95948	0.0710307	0.0769	0.0022	1034.27	19	994.363	11.817	1075	57	1075	57
Barnett-223	323	7.04	1.82433	0.044	0.167772	0.0018	0.0001	5.91017	0.0628741	0.0789	0.0021	1054.88	16	999.824	10.6502	1141	52	1141	52
Barnett-224	513	1.451	1.89167	0.047	0.169455	0.0025	0.55441	5.83771	0.0851972	0.081	0.0017	1078.82	16	1009.11	14.4343	1203	40	1203	40
Barnett-225	81.3407	0.881161	1.74694	0.094947	0.173927	0.00676726	0.795561	5.75615	0.224221	0.0728468	0.00242298	1026.03	34.8275	1033.71	39.1148	1009.69	33.3624	1009.69	33.3624
Barnett-226	440	1.519	1.726	0.034	0.1689	0.0026	0.34179	5.92066	0.0911411	0.0742	0.0014	1015	13	1005	14	1029	38	1029	38
Barnett-227	375	3.03	1.8137	0.037	0.174306	0.0017	0.21019	5.7241	0.055701	0.0755	0.0016	1051.06	13	1035.79	9.9897	1058	42	1058	42
Barnett-228	201.6	2.93	1.88425	0.05	0.175733	0.0024	0.3425	5.66251	0.0769538	0.0778	0.002	1076.21	18	1043.62	13.9953	1117	50	1117	50
Barnett-229	495	2.819	1.926	0.074	0.1881	0.006	0.26822	5.31632	0.16958	0.0746	0.0023	1082	25	1109	32	1045	62	1045	62
Barnett-230	794	2.96	1.947	0.035	0.19	0.0026	0.242	5.26316	0.0720222	0.0754	0.0012	1095	12	1121	14	1069	31	1069	31
Barnett-231	34.71	2.339	1.96597	0.072	0.181257	0.0033	0.28756	5.49149	0.0995163	0.0787	0.0029	1104.6	25	1073.84	19.2697	1127	75	1127	75
Barnett-232	675	1.562	1.891	0.035	0.1813	0.0035	0.47297	5.51572	0.106481	0.076	0.0013	1076	12	1073	19	1087	32	1087	32
Barnett-233	983	1.788	2.11172	0.06	0.183944	0.0037	0.74727	5.38213	0.107179	0.0833	0.0016	1153.34	19	1088.49	21.1176	1266	37	1266	37
Barnett-234	493	1.051	1.992	0.06	0.1889	0.005	0.3139	5.29381	0.140122	0.0768	0.0019	1110	20	1115	27	1113	50	1113	50
Barnett-235	1259	1.259	1.921	0.033	0.1791	0.0019	0.24711	5.58347	0.0592328	0.0779	0.0013	1087	11	1062	10	1129	33	1129	33
Barnett-236	331	0.746	1.935	0.048	0.1817	0.0035	0.12766	5.50358	0.106013	0.0778	0.0015	1090	17	1076	19	1129	38	1129	38
Barnett-237	239.7	2.019	2.1542	0.042	0.196613	0.0023	0.33539	5.07872	0.0593248	0.0795	0.0015	1167.12	13	1157.1	13.2903	1167	38	1167	38
Barnett-238	459	2.135	2.23802	0.045	0.196836	0.0027	0.43647	5.05306	0.0689401	0.0825	0.0015	1193.76	14	1158.3	15.4818	1244	37	1244	37
Barnett-239	388	3.92	2.164	0.049	0.2001	0.0046	0.18799	4.9975	0.114885	0.07989	0.00098	1166	16	1174	25	1187	24	1187	24
Barnett-240	178.9	2.91	2.20647	0.043	0.203173	0.0019	0.24897	4.92854	0.0461519	0.0788	0.0015	1183.82	14	1192.34	11.0701	1149	38	1149	38
Barnett-241	422	4.44	2.31855	0.068	0.203671	0.0027	0.45406	4.89237	0.0646252	0.0826	0.0022	1218.72	21	1195.01	15.6826	1237	52	1237	52
Barnett-242	525	4.94	2.36202	0.06	0.209776	0.0022	0.13376	4.76417	0.0499342	0.0817	0.0022	1231.94	18	1227.62	12.9656	1203	51	1203	51
Barnett-243	81	2.259	2.48156	0.067	0.215384	0.0024	0.26218	4.63607	0.0515835	0.0836	0.0022	1267.44	19	1257.44	14.0518	1244	51	1244	51
Barnett-244	177.4	1.936	2.67679	0.056	0.226108	0.0021	0.2809	4.41696	0.0409701	0.0859	0.0017	1322.88	15	1314.07	12.206	1312	39	1312	39
Barnett-245	1053	2.84	2.5616	0.085	0.203803	0.0033	0.3532	4.83325	0.0770891	0.0912	0.0028	1290.54	24	1195.72	19.0098	1430	58	1430	58
Barnett-246	258.9	1.601	2.329	0.064	0.1894	0.0039	0.28078	5.27983	0.108719	0.0909	0.0019	1218	19	1117	21	1433	41	1433	41
Barnett-247	97.8	1.951	2.48825	0.1	0.18613	0.0033	0.38226	5.22466	0.0900804	0.097	0.0035	1269.39	30	1100.38	19.0717	1527	71	1527	71
Barnett-248	297.9	0.552	2.97527	0.08	0.219172	0.0057	0.81216	4.47027	0.113905	0.0985	0.0016	1402.18	21	1277.5	31.7405	1589	31	1589	31
Barnett-249	429	1.845	3.95044	0.12	0.282128	0.0029	0.26715	3.53107	0.0361586	0.1016	0.0029	1625.07	24	1602.07	17.3611	1617	53	1617	53
Barnett-250	594	1.079	0.171	0.011	0.01139	0.00029	0.45666	87.7963	2.23538	0.1115	0.0074	158.9	9.1	73	1.8	1660	130	1660	130
Barnett-251	257.9	0.367	2.6839	0.094	0.183373	0.0052	0.39567	5.23286	0.142391	0.1062	0.0036	1324.84	25	1085.38	29.0854	1716	61	1716	61
Barnett-252	250.5	1.202	4.49086	0.096	0.304821	0.0045	0.65173	3.27225	0.0481843	0.1069	0.0021	1730.34	18	1715.17	25.6368	1732	36	1732	36
* U-Pb and Hf data simultaneously acquired by split-stream laser ablation (LASS)
*, grains not used for age calculation because of pb loss

## Sheet: Table S2
Table DR2. Zircon Hf isotopic values																		Std	PLESOVICE
																		Std true	0.282482		correction factor
																		Std measured	0.282442		1.00014
				Measured	Corrected
Samples ID	U-Pb date	Date Uncertainty	ℇHf(t)	176Hf/177Hf	176Hf/177Hf	2SE	176Lu/177Hf	2SE	176Yb/177Hf	2SE	178Hf/177Hf	2SE	180Hf/177Hf	2SE	176Hf/177Hfi	EHf0	2SE
Hatton-1	328.903	5.95818	4.2121	0.282682	0.28271	4.8e-05	0.0021	0.00035	0.072	0.012	1.46725	7.7e-05	1.88693	0.00021	0.282697	-2.65219	1.69802
Hatton-32	327.976	4.16074	1.42355	0.282597	0.282625	3.3e-05	0.001001	1.4e-05	0.0317	0.0011	1.46727	5.4e-05	1.88717	0.00016	0.282619	-5.65801	1.16774
Hatton-76	325.038	3.50206	0.655396	0.282577	0.282606	2.9e-05	0.00115	0.0001	0.0356	0.0026	1.46722	9.2e-05	1.88712	0.00023	0.282599	-6.3299	1.02627
Hatton-79	326.047	3.54982	1.48114	0.282598	0.282628	1.9e-05	0.0010323	8.3e-06	0.0327	0.0007	1.46719	7.2e-05	1.88706	0.00019	0.282622	-5.55192	0.672333
Lower Mud Creek-9	324.975	4.05292	0.66026	0.282585	0.282615	4.4e-05	0.0026	0.00062	0.088	0.021	1.46725	5.5e-05	1.88706	0.00017	0.282599	-6.01163	1.55705
Lower Mud Creek-14	329.53	5.16817	0.749273	0.282578	0.282609	4e-05	0.00165	0.00028	0.0545	0.008	1.46718	8.6e-05	1.88696	0.0002	0.282599	-6.22381	1.41554
Lower Mud Creek-18	324.976	3.42298	0.552548	0.282577	0.282608	3.7e-05	0.00195	0.00044	0.061	0.013	1.46719	9.7e-05	1.88701	0.00019	0.282596	-6.25917	1.30938
Lower Mud Creek-21	327.672	4.31711	3.13318	0.282642	0.282673	4.6e-05	0.00092	6.7e-05	0.0299	0.0046	1.46721	0.00012	1.88702	0.00025	0.282667	-3.96061	1.6275
Lower Mud Creek-30	326.025	4.37595	2.28301	0.282628	0.28266	4.6e-05	0.00256	0.0009	0.084	0.029	1.4672	8e-05	1.88705	0.00018	0.282644	-4.42032	1.62758
Lower Mud Creek-32	328.809	4.68908	1.83618	0.282604	0.282637	3.5e-05	0.001139	2.4e-05	0.0383	0.002	1.4672	7.9e-05	1.88716	0.0002	0.28263	-5.23366	1.23848
Lower Mud Creek-59	326.723	4.44858	3.79562	0.282662	0.282695	4.3e-05	0.001361	7.2e-05	0.0478	0.0054	1.46723	0.0002	1.88716	0.0003	0.282687	-3.18263	1.52125
Lower Mud Creek-66	327.9	4.13654	0.985028	0.282581	0.282614	3.2e-05	0.00122	0.00013	0.0402	0.0056	1.46727	7.9e-05	1.88711	0.00021	0.282607	-6.047	1.13242
Lower Mud Creek-69	326.068	7.46802	-4.89048	0.28241	0.28245	0.00012	0.00137	0.00012	0.0397	0.0029	1.46727	0.00011	1.88732	0.00033	0.282442	-11.8465	4.24914
Lower Mud Creek-92	325.235	8.69364	3.46539	0.282655	0.282689	3.9e-05	0.00176	0.00028	0.059	0.01	1.46726	0.00012	1.88709	0.00023	0.282678	-3.39481	1.37977
Lower Mud Creek-93	324.853	5.56385	2.47194	0.282626	0.28266	4.6e-05	0.00157	0.00011	0.0491	0.003	1.46722	6.1e-05	1.88705	0.00021	0.28265	-4.42032	1.62759
Beavers Bend-3	325.798	4.4067	2.36048	0.282628	0.282655	3.9e-05	0.00136	0.00012	0.0439	0.003	1.46721	7.4e-05	1.88705	0.00023	0.282647	-4.59713	1.37991
Beavers Bend-9	327.257	3.52372	1.37474	0.282606	0.28263	3.1e-05	0.00197	0.00061	0.065	0.02	1.46721	8.9e-05	1.88703	0.0002	0.282618	-5.4812	1.09693
Beavers Bend-10	328.101	5.10096	2.52531	0.282637	0.282659	4.2e-05	0.00148	0.00026	0.0476	0.0094	1.46713	6.8e-05	1.8868	0.00016	0.28265	-4.45568	1.48601
Beavers Bend-17	329.747	4.27597	8.76048	0.282838	0.282861	5.1e-05	0.00582	0.00049	0.217	0.013	1.46721	8.3e-05	1.88687	0.00024	0.282825	2.68755	1.80315
Beavers Bend-19	326.269	3.48687	1.89835	0.282619	0.282643	3.3e-05	0.00158	0.00015	0.0499	0.0045	1.46723	5.6e-05	1.88704	0.00024	0.282633	-5.02148	1.16765
Beavers Bend-24	328.306	4.71775	4.48192	0.28269	0.282714	3.7e-05	0.001453	5.3e-05	0.0445	0.0033	1.46729	0.00013	1.88698	0.00023	0.282705	-2.51074	1.30885
Beavers Bend-30	328.206	3.73053	1.11611	0.282601	0.282626	3.8e-05	0.0026	0.00011	0.0824	0.0056	1.46721	9.1e-05	1.88698	0.00022	0.28261	-5.62265	1.34465
Beavers Bend-39	328.633	3.85947	2.27913	0.282628	0.282654	2.7e-05	0.00185	0.0003	0.06	0.011	1.46721	5.6e-05	1.88695	0.00023	0.282643	-4.63249	0.955319
Beavers Bend-49	325.326	4.7867	2.46225	0.28263	0.282655	5.6e-05	0.000841	3.6e-05	0.02625	0.00067	1.46721	7.8e-05	1.88709	0.00015	0.28265	-4.59713	1.98139
Beavers Bend-55	325.613	3.48345	2.59818	0.282644	0.28267	3.4e-05	0.0027	0.00058	0.087	0.019	1.46722	6.3e-05	1.88714	0.00021	0.282654	-4.06669	1.20293
Beavers Bend-80	328.18	4.61446	1.22731	0.282593	0.28262	2.8e-05	0.00111	0.00018	0.0363	0.0075	1.46716	9e-05	1.88704	0.00017	0.282613	-5.83482	0.990824
Beavers Bend-94	327.856	4.72516	0.755976	0.282578	0.282605	2.6e-05	0.000804	9.7e-05	0.0251	0.0035	1.46724	8.8e-05	1.88707	0.00019	0.2826	-6.36526	0.9201
Barnett-29	308.2	4.8	1.68772	0.282643	0.282648	6.5e-05	0.00153	0.00021	0.0494	0.0045	1.46715	0.00011	1.88663	0.00025	0.282639	-4.85784	2.29972
Barnett-34*	311.8	4.8	6.07921	0.282771	0.282776	4.3e-05	0.00257	0.00021	0.109	0.01	1.46723	6.2e-05	1.88661	0.00012	0.282761	-0.331354	1.52067
Barnett-46*	317	9.6	2.27203	0.282653	0.282658	2.9e-05	0.001326	9.7e-05	0.0485	0.0032	1.46714	5.6e-05	1.88655	0.00016	0.28265	-4.5042	1.02599
Barnett-56*	319	3.8	1.37942	0.282454	0.28263	2.9e-05	0.001128	2.3e-05	0.02633	0.00073	1.46694	4.2e-05	1.8863	0.00012	0.282623	-5.48088	1.02672
Barnett-57*	319	4.6	1.02219	0.282615	0.28262	2.1e-05	0.00108	7.9e-05	0.038	0.0021	1.46722	4.6e-05	1.88669	8.9e-05	0.282613	-5.848	0.74306
Barnett-58	319.3	4.5	1.09252	0.282618	0.282623	3.3e-05	0.00128	0.00011	0.0512	0.0058	1.46724	6.1e-05	1.88679	0.00013	0.282615	-5.74191	1.16765
Barnett-71*	321.6	5.7	2.33583	0.282658	0.282663	4.2e-05	0.00232	0.00012	0.0852	0.0044	1.46715	5.4e-05	1.88663	0.00013	0.282649	-4.32739	1.48589
Barnett-77*	322.9	11.2738	2.19556	0.282474	0.28265	3.4e-05	0.001017	4.6e-05	0.0241	0.0014	1.46696	3.6e-05	1.88629	0.00012	0.282644	-4.77319	1.20365
Barnett-79	323.105	7.4534	4.39092	0.282673	0.282715	5.5e-05	0.001524	9.6e-05	0.0445	0.0037	1.46704	0.0001	1.88683	0.00019	0.282706	-2.47538	1.94571
Barnett-83*	323.4	6.6	1.17461	0.282618	0.282623	2.6e-05	0.001308	3.8e-05	0.0433	0.0011	1.46719	3.5e-05	1.88672	9.1e-05	0.282615	-5.74191	0.91997
Barnett-89	324.5	4.8	0.79466	0.282608	0.282613	2.4e-05	0.001539	4.5e-05	0.0573	0.0038	1.46721	4.2e-05	1.88664	0.00012	0.282603	-6.09554	0.849233
Barnett-91	324.832	4.27671	3.22864	0.28264	0.282681	5.1e-05	0.001505	6.3e-05	0.0413	0.0037	1.46712	0.00013	1.88704	0.00032	0.282672	-3.67771	1.80442
Barnett-94*	325	5.2	1.67999	0.282631	0.282636	2.4e-05	0.001257	6.7e-05	0.0466	0.0021	1.46721	4.5e-05	1.88673	9.4e-05	0.282628	-5.28219	0.849164
Barnett-95	325.12	4.97825	1.82067	0.282599	0.282639	5.1e-05	0.00117	0.00012	0.0324	0.0023	1.46724	7.3e-05	1.88726	0.00018	0.282632	-5.16293	1.80468
Barnett-96	325.12	3.89947	2.94448	0.282629	0.282671	3.2e-05	0.00121	0.00018	0.0371	0.0063	1.46721	8.9e-05	1.88726	0.00022	0.282664	-4.03133	1.13223
Barnett-97*	325.4	4.7	1.75739	0.282631	0.282636	2.9e-05	0.000938	5e-05	0.0321	0.0016	1.46722	4e-05	1.88674	8e-05	0.28263	-5.28219	1.02607
Barnett-99	325.574	4.52016	-2.69126	0.282469	0.282511	4.8e-05	0.001133	8.8e-05	0.0293	0.0018	1.46714	0.00011	1.88692	0.00026	0.282504	-9.68934	1.6993
Barnett-102*	325.7	7.3	1.34701	0.282619	0.282624	2.8e-05	0.000902	3.4e-05	0.0329	0.0019	1.46721	5.4e-05	1.8867	0.00015	0.282618	-5.70655	0.990733
Barnett-103	325.7	5.6	1.78288	0.282633	0.282638	2.5e-05	0.001178	8.5e-05	0.0434	0.0031	1.46719	3.8e-05	1.88668	0.00011	0.28263	-5.21147	0.884539
Barnett-107*	326.1	4.6	2.35356	0.28265	0.282655	2.4e-05	0.001361	8.6e-05	0.0483	0.003	1.46721	4e-05	1.88661	9.5e-05	0.282646	-4.61029	0.849107
Barnett-111	326.439	3.55618	4.34908	0.282666	0.282708	3e-05	0.000901	1.8e-05	0.02594	0.00052	1.46721	0.0001	1.88717	0.00021	0.282702	-2.72292	1.06132
Barnett-112	326.625	4.479	3.81916	0.282653	0.282694	1.5e-05	0.001079	5.7e-05	0.0305	0.0025	1.4672	9.4e-05	1.88713	0.00019	0.282687	-3.21799	0.530686
Barnett-120	328.457	3.1779	2.89602	0.282628	0.282668	1.8e-05	0.001275	9.7e-05	0.037	0.0016	1.46717	9.7e-05	1.88725	0.00011	0.28266	-4.13742	0.63688
Barnett-125	329.383	4.07719	3.14855	0.282632	0.282673	2.8e-05	0.00102	3.8e-05	0.0311	0.0015	1.46711	6.9e-05	1.88706	0.00027	0.282667	-3.96061	0.990688
Barnett-129*	330.1	4.7	2.51801	0.282651	0.282656	3.3e-05	0.001163	5.9e-05	0.0413	0.0015	1.46725	4.7e-05	1.88669	0.00013	0.282648	-4.57493	1.16752
Barnett-132*	330.5	5.2	2.05985	0.282642	0.282647	2.4e-05	0.00184	0.00018	0.0624	0.0049	1.46722	5.3e-05	1.88658	0.00013	0.282635	-4.8932	0.849131
Barnett-133*	330.6	5	2.04475	0.282639	0.282644	3.3e-05	0.001434	8e-05	0.0518	0.001	1.46721	4.5e-05	1.88667	0.00013	0.282635	-4.99929	1.16757
Barnett-137*	331	5.1	2.30754	0.282645	0.28265	3.2e-05	0.001243	4.3e-05	0.0449	0.0014	1.46723	4.9e-05	1.88662	0.00011	0.282642	-4.78711	1.13216
Barnett-144	332.2	7.9	0.136129	0.282587	0.282592	6.7e-05	0.0019	0.00015	0.062	0.0028	1.46722	8e-05	1.88667	0.00014	0.28258	-6.83817	2.37095
Barnett-145*	332.3	7.9	1.79378	0.282459	0.282635	4.5e-05	0.001325	3.1e-05	0.0314	0.0011	1.46694	4.8e-05	1.88617	9.9e-05	0.282627	-5.30396	1.59315
Barnett-151*	333.6	5	1.39979	0.282618	0.282623	3.7e-05	0.00128	6.9e-05	0.0489	0.0025	1.46723	6.5e-05	1.88682	0.00014	0.282615	-5.74191	1.30919
Barnett-152*	333.9	5.5	7.18928	0.282783	0.282788	3.2e-05	0.001534	7.5e-05	0.05843	0.00085	1.46716	6.7e-05	1.88667	0.00014	0.282778	0.0930037	1.13161
Barnett-160	336.595	4.43068	3.13335	0.282627	0.282669	2.6e-05	0.001154	9.5e-05	0.0331	0.0019	1.46725	6.5e-05	1.88724	0.00017	0.282662	-4.10206	0.91994
Barnett-162*	337.3	9.4	1.06619	0.282435	0.282611	3.4e-05	0.001258	7.4e-05	0.0301	0.0018	1.46693	5e-05	1.88626	0.00013	0.282603	-6.15319	1.20382
Barnett-163*	337.9	11.2	2.30903	0.282469	0.282645	3.8e-05	0.001084	9.9e-05	0.0241	0.0026	1.46697	5e-05	1.88633	0.00014	0.282638	-4.95011	1.34528
Barnett-164*	338.4	4.2	1.74265	0.282624	0.282629	2.1e-05	0.001158	6.8e-05	0.042	0.0034	1.46721	5.1e-05	1.88671	9.3e-05	0.282621	-5.52973	0.743037
Barnett-167*	339.3	10.8	2.86763	0.282485	0.282661	4.2e-05	0.001312	6e-05	0.031	0.0015	1.467	4.9e-05	1.88627	0.00012	0.282653	-4.38396	1.4868
Barnett-170*	339.9	4.3	2	0.282634	0.282639	3e-05	0.001598	6e-05	0.0576	0.0023	1.46717	3.9e-05	1.88668	9.4e-05	0.282628	-5.1761	1.06144
* U-Pb and Hf data simultaneously acquired by split-stream laser ablation (LASS)
*Barnett-34 was not used for Hf interpretation because its TIMS date is 375Ma, check Table DR3

## Sheet: DM and CHUR reference
	Lu-Hf Parameters:
1.867e-11	Lu 176 decay constant
0.0336	176Lu/177Hf chur						Ehf				Ehf
0.282785	176Hf/177Hf chur present			TIME		DM	DM		CHUR		CHUR		New Crust
				0		0.283225	15.5595		0.282785		0		13.2
Depleted Mantle Parameters				100		0.283153	15.2383		0.282722		0
0.038512	176Lu/177Hf			200		0.283081	14.9163		0.282659		0
0.283225	176Hf/177Hf			300		0.283009	14.5936		0.282596		0
				400		0.282936	14.2702		0.282533		0
				500		0.282864	13.946		0.28247		0
CHUR today				600		0.282791	13.621		0.282406		0
176Hf/177Hf	0.282785			700		0.282718	13.2953		0.282343		0
176Lu/177Hf	0.0336			800		0.282645	12.9688		0.282279		0
decay	1.867e-11			900		0.282572	12.6416		0.282216		0
				1000		0.282499	12.3136		0.282152		0
				1100		0.282426	11.9849		0.282088		0
				1200		0.282352	11.6554		0.282024		0
				1300		0.282279	11.3251		0.28196		0
				1400		0.282205	10.9941		0.281895		0
	NO MODIFICAR			1500		0.282131	10.6623		0.281831		0
				1600		0.282057	10.3297		0.281766		0
				1700		0.281983	9.99631		0.281701		0
				1800		0.281909	9.66218		0.281637		0
				1900		0.281834	9.32726		0.281572		0
				2000		0.28176	8.99157		0.281507		0
				2100		0.281685	8.65509		0.281441		0
				2200		0.28161	8.31782		0.281376		0
				2300		0.281535	7.97977		0.281311		0
				2400		0.28146	7.64093		0.281245		0
				2500		0.281385	7.3013		0.28118		0
				2600		0.281309	6.96088		0.281114		0
				2700		0.281234	6.61965		0.281048		0
				2800		0.281158	6.27763		0.280982		0
				2900		0.281082	5.93481		0.280916		0
				3000		0.281006	5.59119		0.280849		0
				3100		0.28093	5.24676		0.280783		0
				3200		0.280854	4.90153		0.280716		0
				3300		0.280778	4.55548		0.28065		0
				3400		0.280701	4.20863		0.280583		0
				3500		0.280624	3.86096		0.280516		0
				3600		0.280548	3.51247		0.280449		0
				3700		0.280471	3.16317		0.280382		0
				3800		0.280393	2.81305		0.280315		0
				3900		0.280316	2.4621		0.280247		0
				4000		0.280239	2.11033		0.28018		0
				4100		0.280161	1.75773		0.280112		0
				4200		0.280084	1.4043		0.280044		0
				4300		0.280006	1.05003		0.279976		0
				4400		0.279928	0.694938		0.279908		0
				4500		0.27985	0.339006		0.27984		0
				4600		0.279771	-0.0177664		0.279772		0		0

## Sheet: PlotDat18
Source sheet	Sheet1	0.3	326.767	1	323.9	4.6
Plot name	Average17	54.7	326.767	2	324	4.9
Plot Type	15			3	324.092	3.63249
1st free col	8			4	324.5	5.5
Sigma Level	2			5	324.5	4.8
Absolute Errs	TRUE			6	324.502	3.50945
Symbol Type	1			7	324.832	4.27671
Inverse Plot	FALSE			8	324.894	3.81925
Color Plot	TRUE			9	324.914	3.80917
3D plot	FALSE			10	325	5.2
Linear	FALSE			11	325.12	4.97825
Data Range	A91:B138,A139:B139,A89:B90,A88:B88,A140:B140,A141:B141			12	325.12	3.89947
Filled Symbols	FALSE			13	325.4	4.7
ConcAge	FALSE			14	325.45	3.68582
ConcSwap	FALSE			15	325.574	4.52016
1st Symbol-row	1			16	325.655	4.18187
				17	325.697	4.74168
				18	325.7	7.3
				19	325.7	5.6
				20	325.773	13.388
				21	325.965	2.94855
				22	326.048	6.05915
				23	326.1	4.6
				24	326.2	5.3
				25	326.3	6
				26	326.4	4.6
				27	326.439	3.55618
				28	326.625	4.479
				29	326.69	10.8829
				30	326.7	4.8
				31	326.7	4.8
				32	327.1	4.6
				33	327.2	8.9
				34	328.035	12.0676
				35	328.4	5.6
				36	328.457	3.1779
				37	328.5	5
				38	328.5	4.8
				39	328.524	3.25196
				40	329.097	3.85962
				41	329.383	4.07719
				42	329.409	3.12081
				43	329.8	5.1
				44	329.8	5.1
				45	330.1	4.7
				46	330.296	10.3076
				47	330.431	5.38895
				48	330.5	5.2
				49	330.6	5
				50	323.741	5.74953
				51	323.742	3.77323
				52	323.7	4.3
				53	330.769	3.54044
				54	330.77	4.43594
				IsoLine	IsoLine	IsoLine	IsoLine

## Sheet: PlotDat19
Source sheet	Sheet1	0.3	326.732	1	323.9	4.6
Plot name	Average18	54.7	326.732	2	324	4.9
Plot Type	15			3	324.092	3.63249
1st free col	8			4	324.5	5.5
Sigma Level	2			5	324.5	4.8
Absolute Errs	TRUE			6	324.502	3.50945
Symbol Type	1			7	324.832	4.27671
Inverse Plot	FALSE			8	324.894	3.81925
Color Plot	TRUE			9	324.914	3.80917
3D plot	FALSE			10	325	5.2
Linear	FALSE			11	325.12	4.97825
Data Range	A91:B138,A139:B139,A89:B90,A88:B88,A141:B141,A142:B142			12	325.12	3.89947
Filled Symbols	FALSE			13	325.4	4.7
ConcAge	FALSE			14	325.45	3.68582
ConcSwap	FALSE			15	325.574	4.52016
1st Symbol-row	1			16	325.655	4.18187
				17	325.697	4.74168
				18	325.7	7.3
				19	325.7	5.6
				20	325.773	13.388
				21	325.965	2.94855
				22	326.048	6.05915
				23	326.1	4.6
				24	326.2	5.3
				25	326.3	6
				26	326.4	4.6
				27	326.439	3.55618
				28	326.625	4.479
				29	326.69	10.8829
				30	326.7	4.8
				31	326.7	4.8
				32	327.1	4.6
				33	327.2	8.9
				34	328.035	12.0676
				35	328.4	5.6
				36	328.457	3.1779
				37	328.5	5
				38	328.5	4.8
				39	328.524	3.25196
				40	329.097	3.85962
				41	329.383	4.07719
				42	329.409	3.12081
				43	329.8	5.1
				44	329.8	5.1
				45	330.1	4.7
				46	330.296	10.3076
				47	330.431	5.38895
				48	330.5	5.2
				49	330.6	5
				50	323.741	5.74953
				51	323.742	3.77323
				52	323.7	4.3
				53	330.77	4.43594
				54	330.8	4.2
				IsoLine	IsoLine	IsoLine	IsoLine

## Sheet: PlotDat20
Source sheet	Sheet1	0.3	326.642	1	323.9	4.6
Plot name	Average19	53.7	326.642	2	324	4.9
Plot Type	15			3	324.092	3.63249
1st free col	8			4	324.5	5.5
Sigma Level	2			5	324.5	4.8
Absolute Errs	TRUE			6	324.502	3.50945
Symbol Type	1			7	324.832	4.27671
Inverse Plot	FALSE			8	324.894	3.81925
Color Plot	TRUE			9	324.914	3.80917
3D plot	FALSE			10	325	5.2
Linear	FALSE			11	325.12	4.97825
Data Range	A91:B138,A139:B139,A89:B90,A88:B88,A141:B141			12	325.12	3.89947
Filled Symbols	FALSE			13	325.4	4.7
ConcAge	FALSE			14	325.45	3.68582
ConcSwap	FALSE			15	325.574	4.52016
1st Symbol-row	1			16	325.655	4.18187
				17	325.697	4.74168
				18	325.7	7.3
				19	325.7	5.6
				20	325.773	13.388
				21	325.965	2.94855
				22	326.048	6.05915
				23	326.1	4.6
				24	326.2	5.3
				25	326.3	6
				26	326.4	4.6
				27	326.439	3.55618
				28	326.625	4.479
				29	326.69	10.8829
				30	326.7	4.8
				31	326.7	4.8
				32	327.1	4.6
				33	327.2	8.9
				34	328.035	12.0676
				35	328.4	5.6
				36	328.457	3.1779
				37	328.5	5
				38	328.5	4.8
				39	328.524	3.25196
				40	329.097	3.85962
				41	329.383	4.07719
				42	329.409	3.12081
				43	329.8	5.1
				44	329.8	5.1
				45	330.1	4.7
				46	330.296	10.3076
				47	330.431	5.38895
				48	330.5	5.2
				49	330.6	5
				50	323.741	5.74953
				51	323.742	3.77323
				52	323.7	4.3
				53	330.77	4.43594
				IsoLine	IsoLine	IsoLine	IsoLine
